# Supplementary material
Source: publisher figshare collection journal article supplement (https://acs.figshare.com/ndownloader/files/5716101)
Supplement: Supplementary file 1 [file 5716101]

# ic991415s.cif

#==============================================================================
data_global
#==============================================================================

# 0. AUDIT DETAILS

_audit_creation_date                 'Jan 11 15:03:37 2000'
_audit_creation_method               'PLATON <TABLE ACC> option' 

#===============================================================================

# 1. SUBMISSION DETAILS

_publ_contact_author_name           # Name of author for correspondence
;
 A.L.Spek 
;
_publ_contact_author_address        # address of author for correspondence
;
 Utrecht University
 Padualaan 8
 3584 CH Utrecht
 The Netherlands 
;


#===============================================================================

data_s1662a  

#===============================================================================

# 5. CHEMICAL DATA

_chemical_name_systematic           
;
 ?
;
_chemical_melting_point              ?
_chemical_formula_moiety            'C28 H37 N3 O2 V, C4 H10 O'
_chemical_formula_sum               'C32 H47 N3 O3 V'
_chemical_formula_weight               572.69 
_chemical_compound_source           'see text'

loop_
_atom_type_symbol                   
_atom_type_description              
_atom_type_scat_dispersion_real     
_atom_type_scat_dispersion_imag     
_atom_type_scat_source              
 V   V    0.3005    0.5294
 'International Tables Vol C Tables 4.2.6.8 and 6.1.1.4'
 O   O    0.0106    0.0060
 'International Tables Vol C Tables 4.2.6.8 and 6.1.1.4'
 N   N    0.0061    0.0033
 'International Tables Vol C Tables 4.2.6.8 and 6.1.1.4'
 H   H    0.0000    0.0000
 'International Tables Vol C Tables 4.2.6.8 and 6.1.1.4'
 C   C    0.0033    0.0016
 'International Tables Vol C Tables 4.2.6.8 and 6.1.1.4'

#===============================================================================

# 6. CRYSTAL DATA

_symmetry_cell_setting                  Triclinic
_symmetry_space_group_name_Hall      '-P 1'
_symmetry_space_group_name_H-M       'P -1'

loop_
_symmetry_equiv_pos_as_xyz          
 x,y,z                         
 -x,-y,-z                      

_cell_length_a                          11.1557(6)
_cell_length_b                         12.5744(12)
_cell_length_c                         13.1051(14)
_cell_angle_alpha                        64.244(8)
_cell_angle_beta                         70.472(7)
_cell_angle_gamma                        87.950(6)
_cell_volume                             1547.4(3)
_cell_formula_units_Z                    2
_cell_measurement_temperature          150
_cell_measurement_reflns_used       25 
_cell_measurement_theta_min         9.74 
_cell_measurement_theta_max         13.78 

_exptl_crystal_description          plate 
_exptl_crystal_colour               brown 
_exptl_crystal_size_max            0.4 
_exptl_crystal_size_mid            0.4 
_exptl_crystal_size_min            0.1 
_exptl_crystal_density_diffrn            1.229
_exptl_crystal_density_method       'Not Measured'
_exptl_crystal_F_000                       614
_exptl_absorpt_coefficient_mu            0.38
_exptl_absorpt_correction_type      none 

#===============================================================================

# 7. EXPERIMENTAL DATA

_exptl_special_details              
; ?
;
_diffrn_ambient_temperature         150 
_diffrn_radiation_wavelength           0.71073
_diffrn_radiation_type               'Mo K\a'
_diffrn_radiation_source            'Rotating Anode' 
_diffrn_radiation_monochromator      'graphite' 

_diffrn_measurement_device_type     'CAD4T' 
_diffrn_measurement_method          'omega-scan' 

_diffrn_standards_number             3


# number of measured reflections (redundant set)
_diffrn_reflns_number                 7723
_diffrn_reflns_av_R_equivalents       0.0745
_diffrn_reflns_av_sigmaI/netI         0.1084
_diffrn_reflns_limit_h_min             -14
_diffrn_reflns_limit_h_max               8
_diffrn_reflns_limit_k_min             -16
_diffrn_reflns_limit_k_max              16
_diffrn_reflns_limit_l_min             -17
_diffrn_reflns_limit_l_max              16
_diffrn_reflns_theta_min              1.81
_diffrn_reflns_theta_max             27.48

# number of unique reflections
_reflns_number_total                    7094
# number of observed reflections (> n sig(I))
_reflns_number_gt                       4338
_reflns_threshold_expression         'I>2\s(I)' 

_computing_structure_refinement      'SHELXL-97 (Sheldrick, 1997)'
_computing_publication_material      'PLATON (Spek, 1990)' 

#===============================================================================

# 8. REFINEMENT DATA

_refine_special_details             
;
 Refinement on F^2 for ALL reflections except those
 flagged by the user for potential systematic errors.
 Weighted R-factors wR and all goodnesses of fit S
 are based on F^2, conventional R-factors R are based
 on F, with F set to zero for negative F^2. The
 observed criterion of F^2 > 2sigma(F^2) is used only
 for calculating -R-factor-obs etc. and is not
 relevant to the choice of reflections for refinement.
 R-factors based on F^2 are statistically about twice
 as large as those based on F, and R-factors based on
 ALL data will be even larger.

 The Solvent contribution to the Structure Factors was taken into
 account using the SQUEEZE technique.
;
_refine_ls_structure_factor_coef     Fsqd       
_refine_ls_matrix_type               full       
_refine_ls_weighting_scheme          'calc'
_refine_ls_weighting_details        
 'w-1=sigma**(F**2) + (0.0782*P)**2 '                                                                              
_refine_ls_hydrogen_treatment        'H-atom refinement: see text ' 
_refine_ls_extinction_method         none       
_refine_ls_abs_structure_details     none
_refine_ls_abs_structure_Flack       none
_refine_ls_number_reflns                  7094
_refine_ls_number_parameters               315
_refine_ls_R_factor_all                 0.1135
_refine_ls_R_factor_gt                  0.0666
_refine_ls_wR_factor_ref                0.1634
_refine_ls_wR_factor_gt                 0.1448
_refine_ls_goodness_of_fit_ref           0.963
_refine_ls_restrained_S_all              0.963
_refine_ls_shift/su_max                  0.000
_refine_ls_shift/su_mean                 0.000
_refine_diff_density_max                 0.421
_refine_diff_density_min                -0.374
_refine_diff_density_rms                 0.075

#===============================================================================

# 9. ATOMIC COORDINATES AND THERMAL PARAMETERS

loop_
_atom_site_label                    
_atom_site_type_symbol              
_atom_site_thermal_displace_type    
_atom_site_fract_x                  
_atom_site_fract_y                  
_atom_site_fract_z                  
_atom_site_occupancy                
_atom_site_U_iso_or_equiv           
 V1     V  Uani    0.41505(5)   0.15131(5)   0.19478(5)     1.000    0.0201(2)  
 O1     O  Uani     0.5618(2)  0.09839(19)  0.11688(19)     1.000    0.0237(7)  
 O2     O  Uani     0.2389(2)    0.1180(2)    0.2198(2)     1.000    0.0262(7)  
 N1     N  Uani     0.3835(2)   -0.0162(2)    0.3549(2)     1.000    0.0215(8)  
 N2     N  Uani     0.4349(2)    0.2862(2)    0.0145(2)     1.000    0.0244(8)  
 N3     N  Uani     0.4492(2)    0.2406(2)    0.2497(2)     1.000    0.0238(8)  
 C1     C  Uani     0.6350(3)    0.0133(3)    0.1573(3)     1.000    0.0212(9)  
 C2     C  Uani     0.6106(3)   -0.0575(3)    0.2809(3)     1.000    0.0226(9)  
 C3     C  Uani     0.6866(3)   -0.1469(3)    0.3163(3)     1.000   0.0260(10)  
 C4     C  Uani     0.7885(3)   -0.1657(3)    0.2331(3)     1.000   0.0285(11)  
 C5     C  Uani     0.8134(3)   -0.0928(3)    0.1109(3)     1.000   0.0279(10)  
 C6     C  Uani     0.7383(3)   -0.0042(3)    0.0716(3)     1.000   0.0263(10)  
 C7     C  Uani     0.5063(3)   -0.0380(3)    0.3776(3)     1.000   0.0239(10)  
 C8     C  Uani     0.3378(3)   -0.1169(3)    0.3416(3)     1.000   0.0300(11)  
 C9     C  Uani     0.2869(3)   -0.0097(3)    0.4609(3)     1.000   0.0311(10)  
 C10    C  Uani     0.7646(4)    0.0713(3)   -0.0612(3)     1.000   0.0383(12)  
 C11    C  Uani     0.8695(4)   -0.2640(3)    0.2730(4)     1.000   0.0408(12)  
 C12    C  Uani     0.1597(3)    0.1759(3)    0.1626(3)     1.000   0.0237(10)  
 C13    C  Uani     0.1974(3)    0.2899(3)    0.0644(3)     1.000   0.0246(10)  
 C14    C  Uani     0.1115(3)    0.3428(3)    0.0070(3)     1.000   0.0313(11)  
 C15    C  Uani    -0.0096(3)    0.2870(3)    0.0424(3)     1.000   0.0319(11)  
 C16    C  Uani    -0.0458(3)    0.1740(3)    0.1411(3)     1.000   0.0323(11)  
 C17    C  Uani     0.0361(3)    0.1175(3)    0.2018(3)     1.000   0.0255(10)  
 C18    C  Uani     0.3250(3)    0.3579(3)    0.0254(3)     1.000   0.0297(11)  
 C19    C  Uani     0.4369(3)    0.2348(3)   -0.0680(3)     1.000   0.0307(11)  
 C20    C  Uani     0.5557(3)    0.3658(3)   -0.0371(3)     1.000   0.0322(11)  
 C21    C  Uani    -0.0054(3)   -0.0025(3)    0.3091(3)     1.000   0.0312(11)  
 C22    C  Uani    -0.0989(4)    0.3468(4)   -0.0246(4)     1.000   0.0452(16)  
 C23    C  Uani     0.5143(3)    0.3014(3)    0.2842(3)     1.000   0.0256(10)  
 C24    C  Uani     0.6447(3)    0.2943(3)    0.2631(3)     1.000   0.0358(11)  
 C25    C  Uani     0.7136(4)    0.3567(4)    0.2948(4)     1.000   0.0518(16)  
 C26    C  Uani     0.6527(5)    0.4242(4)    0.3495(4)     1.000   0.0615(19)  
 C27    C  Uani     0.5232(5)    0.4317(4)    0.3730(4)     1.000   0.0533(18)  
 C28    C  Uani     0.4535(4)    0.3716(3)    0.3406(3)     1.000   0.0333(11)  
 H3     H  Uiso       0.66810     -0.19560      0.39840     1.000       0.0310  
 H5     H  Uiso       0.88230     -0.10350      0.05370     1.000       0.0340  
 H7A    H  Uiso       0.49010     -0.10750      0.45480     1.000       0.0290  
 H7B    H  Uiso       0.53670      0.02950      0.38360     1.000       0.0290  
 H8A    H  Uiso       0.32340     -0.18910      0.41490     1.000       0.0450  
 H8B    H  Uiso       0.40120     -0.12450      0.27530     1.000       0.0450  
 H8C    H  Uiso       0.25910     -0.10240      0.32600     1.000       0.0450  
 H9A    H  Uiso       0.27640     -0.08280      0.53230     1.000       0.0470  
 H9B    H  Uiso       0.20650      0.00250      0.44840     1.000       0.0470  
 H9C    H  Uiso       0.31510      0.05530      0.47070     1.000       0.0470  
 H10A   H  Uiso       0.77500      0.15390     -0.07980     1.000       0.0570  
 H10B   H  Uiso       0.69400      0.05550     -0.08110     1.000       0.0570  
 H10C   H  Uiso       0.84160      0.05270     -0.10760     1.000       0.0570  
 H11A   H  Uiso       0.95680     -0.22990      0.24540     1.000       0.0610  
 H11B   H  Uiso       0.86580     -0.31730      0.23920     1.000       0.0610  
 H11C   H  Uiso       0.83730     -0.30700      0.35980     1.000       0.0610  
 H14    H  Uiso       0.13660      0.41860     -0.05770     1.000       0.0380  
 H16    H  Uiso      -0.12760      0.13540      0.16690     1.000       0.0390  
 H18A   H  Uiso       0.32230      0.38710      0.08350     1.000       0.0350  
 H18B   H  Uiso       0.34050      0.42640     -0.05230     1.000       0.0350  
 H19A   H  Uiso       0.50670      0.18830     -0.07380     1.000       0.0460  
 H19B   H  Uiso       0.44770      0.29780     -0.14680     1.000       0.0460  
 H19C   H  Uiso       0.35740      0.18490     -0.03710     1.000       0.0460  
 H20A   H  Uiso       0.55660      0.39890      0.01630     1.000       0.0480  
 H20B   H  Uiso       0.56220      0.42890     -0.11460     1.000       0.0480  
 H20C   H  Uiso       0.62690      0.32140     -0.04660     1.000       0.0480  
 H21A   H  Uiso      -0.00080      0.00280      0.37860     1.000       0.0470  
 H21B   H  Uiso       0.05000     -0.05780      0.29270     1.000       0.0470  
 H21C   H  Uiso      -0.09200     -0.02950      0.32470     1.000       0.0470  
 H22A   H  Uiso      -0.13500      0.40650     -0.00080     1.000       0.0680  
 H22B   H  Uiso      -0.16650      0.28850     -0.00530     1.000       0.0680  
 H22C   H  Uiso      -0.05190      0.38330     -0.11030     1.000       0.0680  
 H24    H  Uiso       0.68590      0.24700      0.22720     1.000       0.0430  
 H25    H  Uiso       0.80100      0.35250      0.27880     1.000       0.0620  
 H26    H  Uiso       0.69890      0.46560      0.37130     1.000       0.0740  
 H27    H  Uiso       0.48280      0.47760      0.41100     1.000       0.0640  
 H28    H  Uiso       0.36650      0.37750      0.35590     1.000       0.0400  

loop_
_atom_site_aniso_label              
_atom_site_aniso_U_11               
_atom_site_aniso_U_22               
_atom_site_aniso_U_33               
_atom_site_aniso_U_23               
_atom_site_aniso_U_13               
_atom_site_aniso_U_12               
  V1       0.0180(3)  0.0226(3)  0.0216(3)  -0.0108(2)  -0.0082(2)   0.0027(2)  
  O1      0.0255(11) 0.0275(12) 0.0178(12) -0.0105(10)  -0.0074(9)  0.0075(10)  
  O2      0.0237(11) 0.0265(12) 0.0259(13) -0.0077(10) -0.0110(10)   0.0006(9)  
  N1      0.0202(13) 0.0277(15) 0.0169(14) -0.0105(12) -0.0062(11)  0.0043(11)  
  N2      0.0201(13) 0.0256(15) 0.0287(16) -0.0119(13) -0.0101(12) -0.0002(11)  
  N3      0.0259(14) 0.0246(14) 0.0197(14) -0.0109(12) -0.0055(11)  0.0032(11)  
  C1      0.0199(15) 0.0240(17) 0.0225(17) -0.0131(14) -0.0069(13)  0.0003(13)  
  C2      0.0202(15) 0.0274(17) 0.0251(17) -0.0154(15) -0.0089(13)  0.0023(13)  
  C3      0.0267(17) 0.0317(19) 0.0251(18) -0.0147(16) -0.0129(15)  0.0043(14)  
  C4      0.0238(16) 0.0324(19)   0.038(2) -0.0204(17) -0.0152(15)  0.0075(14)  
  C5      0.0201(15) 0.0309(19)   0.035(2) -0.0215(17) -0.0034(14)  0.0039(14)  
  C6      0.0269(17) 0.0300(18) 0.0240(18) -0.0174(15) -0.0040(14)  0.0024(14)  
  C7      0.0220(16) 0.0306(18) 0.0199(17) -0.0110(15) -0.0089(13)  0.0058(14)  
  C8      0.0287(17) 0.0260(18)   0.035(2) -0.0114(16) -0.0139(16)  0.0015(14)  
  C9      0.0265(17)   0.042(2) 0.0166(17) -0.0108(16) -0.0014(14)  0.0073(15)  
  C10       0.042(2)   0.039(2)   0.028(2) -0.0185(18) -0.0011(17)  0.0072(17)  
  C11       0.038(2)   0.043(2)   0.047(2)   -0.024(2) -0.0180(19)  0.0200(18)  
  C12     0.0205(15) 0.0282(17) 0.0297(19) -0.0177(15) -0.0115(14)  0.0080(13)  
  C13     0.0237(16) 0.0250(17) 0.0263(18) -0.0123(15) -0.0092(14)  0.0024(13)  
  C14     0.0288(18)   0.035(2)   0.036(2) -0.0181(17) -0.0160(16)  0.0092(15)  
  C15     0.0264(17)   0.046(2)   0.036(2) -0.0262(19) -0.0164(16)  0.0139(16)  
  C16     0.0192(16)   0.049(2)   0.041(2) -0.0307(19) -0.0115(15)  0.0094(16)  
  C17     0.0194(15) 0.0359(19) 0.0257(18) -0.0192(16) -0.0060(14)  0.0035(14)  
  C18     0.0341(18) 0.0216(17)   0.037(2) -0.0107(16) -0.0206(17)  0.0070(14)  
  C19     0.0351(19)   0.037(2) 0.0204(18) -0.0104(16) -0.0135(15)  0.0017(16)  
  C20     0.0249(17) 0.0258(18)   0.035(2) -0.0041(16) -0.0096(15) -0.0071(14)  
  C21     0.0176(16)   0.039(2)   0.035(2) -0.0198(18) -0.0019(15) -0.0037(14)  
  C22       0.040(2)   0.066(3)   0.052(3)   -0.037(2)   -0.030(2)    0.023(2)  
  C23     0.0315(17) 0.0207(16) 0.0206(17) -0.0048(14) -0.0105(14)  0.0010(14)  
  C24     0.0323(19)   0.033(2)   0.037(2) -0.0082(18) -0.0162(17)  0.0019(16)  
  C25       0.046(2)   0.051(3)   0.050(3)   -0.006(2)   -0.028(2)   -0.010(2)  
  C26       0.083(4)   0.047(3)   0.059(3)   -0.011(2)   -0.045(3)   -0.018(3)  
  C27       0.091(4)   0.038(2)   0.046(3)   -0.024(2)   -0.035(3)    0.007(2)  
  C28       0.049(2) 0.0299(19)   0.029(2) -0.0165(17) -0.0192(18)  0.0111(17)  

#===============================================================================

# 10. MOLECULAR GEOMETRY

_geom_special_details               
;
 Bond distances, angles etc. have been calculated using the
 rounded fractional coordinates. All esds are estimated
 from the variances of the (full) variance-covariance matrix.
 The cell esds are taken into account in the estimation of
 distances, angles and torsion angles
;

loop_
_geom_bond_atom_site_label_1        
_geom_bond_atom_site_label_2        
_geom_bond_distance                 
_geom_bond_site_symmetry_1          
_geom_bond_site_symmetry_2          
_geom_bond_publ_flag                
 V1      O1         1.887(2)                     .       .                   yes
 V1      O2         1.911(2)                     .       .                   yes
 V1      N1         2.164(2)                     .       .                   yes
 V1      N2         2.168(2)                     .       .                   yes
 V1      N3         1.685(3)                     .       .                   yes
 O1      C1         1.351(5)                     .       .                   yes
 O2      C12        1.340(4)                     .       .                   yes
 N1      C7         1.488(4)                     .       .                   yes
 N1      C8         1.480(5)                     .       .                   yes
 N1      C9         1.480(4)                     .       .                   yes
 N2      C18        1.501(5)                     .       .                   yes
 N2      C19        1.476(5)                     .       .                   yes
 N2      C20        1.475(4)                     .       .                   yes
 N3      C23        1.370(5)                     .       .                   yes
 C1      C2         1.400(5)                     .       .                   no 
 C1      C6         1.403(5)                     .       .                   no 
 C2      C3         1.393(5)                     .       .                   no 
 C2      C7         1.511(5)                     .       .                   no 
 C3      C4         1.383(5)                     .       .                   no 
 C4      C5         1.388(5)                     .       .                   no 
 C4      C11        1.514(6)                     .       .                   no 
 C5      C6         1.390(5)                     .       .                   no 
 C6      C10        1.503(5)                     .       .                   no 
 C12     C13        1.402(5)                     .       .                   no 
 C12     C17        1.405(5)                     .       .                   no 
 C13     C14        1.389(5)                     .       .                   no 
 C13     C18        1.496(5)                     .       .                   no 
 C14     C15        1.378(5)                     .       .                   no 
 C15     C16        1.396(5)                     .       .                   no 
 C15     C22        1.512(6)                     .       .                   no 
 C16     C17        1.386(5)                     .       .                   no 
 C17     C21        1.496(5)                     .       .                   no 
 C23     C24        1.394(5)                     .       .                   no 
 C23     C28        1.405(6)                     .       .                   no 
 C24     C25        1.385(6)                     .       .                   no 
 C25     C26        1.363(7)                     .       .                   no 
 C26     C27        1.382(8)                     .       .                   no 
 C27     C28        1.378(7)                     .       .                   no 
 C3      H3           0.9291                     .       .                   no 
 C5      H5           0.9305                     .       .                   no 
 C7      H7A          0.9699                     .       .                   no 
 C7      H7B          0.9685                     .       .                   no 
 C8      H8A          0.9603                     .       .                   no 
 C8      H8B          0.9596                     .       .                   no 
 C8      H8C          0.9602                     .       .                   no 
 C9      H9A          0.9597                     .       .                   no 
 C9      H9B          0.9599                     .       .                   no 
 C9      H9C          0.9592                     .       .                   no 
 C10     H10A         0.9599                     .       .                   no 
 C10     H10B         0.9599                     .       .                   no 
 C10     H10C         0.9604                     .       .                   no 
 C11     H11A         0.9606                     .       .                   no 
 C11     H11B         0.9588                     .       .                   no 
 C11     H11C         0.9600                     .       .                   no 
 C14     H14          0.9294                     .       .                   no 
 C16     H16          0.9303                     .       .                   no 
 C18     H18A         0.9707                     .       .                   no 
 C18     H18B         0.9692                     .       .                   no 
 C19     H19A         0.9594                     .       .                   no 
 C19     H19B         0.9598                     .       .                   no 
 C19     H19C         0.9608                     .       .                   no 
 C20     H20A         0.9598                     .       .                   no 
 C20     H20B         0.9596                     .       .                   no 
 C20     H20C         0.9595                     .       .                   no 
 C21     H21A         0.9596                     .       .                   no 
 C21     H21B         0.9602                     .       .                   no 
 C21     H21C         0.9599                     .       .                   no 
 C22     H22A         0.9596                     .       .                   no 
 C22     H22B         0.9597                     .       .                   no 
 C22     H22C         0.9605                     .       .                   no 
 C24     H24          0.9303                     .       .                   no 
 C25     H25          0.9309                     .       .                   no 
 C26     H26          0.9301                     .       .                   no 
 C27     H27          0.9303                     .       .                   no 
 C28     H28          0.9302                     .       .                   no 

loop_
_geom_angle_atom_site_label_1       
_geom_angle_atom_site_label_2       
_geom_angle_atom_site_label_3       
_geom_angle                         
_geom_angle_site_symmetry_1         
_geom_angle_site_symmetry_2         
_geom_angle_site_symmetry_3         
_geom_angle_publ_flag               
 O1      V1      O2       129.83(12)             .       .       .           yes
 O1      V1      N1        87.69(10)             .       .       .           yes
 O1      V1      N2        85.77(10)             .       .       .           yes
 O1      V1      N3       113.03(12)             .       .       .           yes
 O2      V1      N1        85.61(10)             .       .       .           yes
 O2      V1      N2        87.16(10)             .       .       .           yes
 O2      V1      N3       117.14(12)             .       .       .           yes
 N1      V1      N2       163.72(10)             .       .       .           yes
 N1      V1      N3        97.63(11)             .       .       .           yes
 N2      V1      N3        98.65(11)             .       .       .           yes
 V1      O1      C1         133.6(2)             .       .       .           yes
 V1      O2      C12        134.1(2)             .       .       .           yes
 V1      N1      C7       108.53(19)             .       .       .           yes
 V1      N1      C8       112.06(18)             .       .       .           yes
 V1      N1      C9         109.8(2)             .       .       .           yes
 C7      N1      C8         109.5(3)             .       .       .           yes
 C7      N1      C9         108.4(2)             .       .       .           yes
 C8      N1      C9         108.5(3)             .       .       .           yes
 V1      N2      C18      108.11(17)             .       .       .           yes
 V1      N2      C19        112.6(2)             .       .       .           yes
 V1      N2      C20      109.04(18)             .       .       .           yes
 C18     N2      C19        109.9(2)             .       .       .           yes
 C18     N2      C20        108.7(3)             .       .       .           yes
 C19     N2      C20        108.4(2)             .       .       .           yes
 V1      N3      C23        161.7(2)             .       .       .           yes
 O1      C1      C2         122.2(3)             .       .       .           yes
 O1      C1      C6         118.3(3)             .       .       .           yes
 C2      C1      C6         119.4(3)             .       .       .           no 
 C1      C2      C3         119.2(3)             .       .       .           no 
 C1      C2      C7         122.1(3)             .       .       .           no 
 C3      C2      C7         118.7(3)             .       .       .           no 
 C2      C3      C4         122.1(3)             .       .       .           no 
 C3      C4      C5         118.0(3)             .       .       .           no 
 C3      C4      C11        121.5(3)             .       .       .           no 
 C5      C4      C11        120.6(3)             .       .       .           no 
 C4      C5      C6         121.8(3)             .       .       .           no 
 C1      C6      C5         119.4(3)             .       .       .           no 
 C1      C6      C10        119.6(3)             .       .       .           no 
 C5      C6      C10        120.9(3)             .       .       .           no 
 N1      C7      C2         114.0(3)             .       .       .           yes
 O2      C12     C13        122.3(3)             .       .       .           yes
 O2      C12     C17        117.9(3)             .       .       .           yes
 C13     C12     C17        119.8(3)             .       .       .           no 
 C12     C13     C14        119.0(3)             .       .       .           no 
 C12     C13     C18        121.2(3)             .       .       .           no 
 C14     C13     C18        119.6(3)             .       .       .           no 
 C13     C14     C15        122.4(3)             .       .       .           no 
 C14     C15     C16        117.7(3)             .       .       .           no 
 C14     C15     C22        120.6(3)             .       .       .           no 
 C16     C15     C22        121.7(3)             .       .       .           no 
 C15     C16     C17        122.2(3)             .       .       .           no 
 C12     C17     C16        118.9(3)             .       .       .           no 
 C12     C17     C21        119.7(3)             .       .       .           no 
 C16     C17     C21        121.4(3)             .       .       .           no 
 N2      C18     C13        113.9(3)             .       .       .           yes
 N3      C23     C24        119.6(3)             .       .       .           yes
 N3      C23     C28        121.9(3)             .       .       .           yes
 C24     C23     C28        118.5(4)             .       .       .           no 
 C23     C24     C25        120.9(4)             .       .       .           no 
 C24     C25     C26        119.6(5)             .       .       .           no 
 C25     C26     C27        120.8(5)             .       .       .           no 
 C26     C27     C28        120.4(5)             .       .       .           no 
 C23     C28     C27        119.8(4)             .       .       .           no 
 C2      C3      H3           118.95             .       .       .           no 
 C4      C3      H3           118.97             .       .       .           no 
 C4      C5      H5           119.11             .       .       .           no 
 C6      C5      H5           119.07             .       .       .           no 
 N1      C7      H7A          108.74             .       .       .           no 
 N1      C7      H7B          108.76             .       .       .           no 
 C2      C7      H7A          108.68             .       .       .           no 
 C2      C7      H7B          108.72             .       .       .           no 
 H7A     C7      H7B          107.75             .       .       .           no 
 N1      C8      H8A          109.47             .       .       .           no 
 N1      C8      H8B          109.48             .       .       .           no 
 N1      C8      H8C          109.46             .       .       .           no 
 H8A     C8      H8B          109.48             .       .       .           no 
 H8A     C8      H8C          109.49             .       .       .           no 
 H8B     C8      H8C          109.45             .       .       .           no 
 N1      C9      H9A          109.45             .       .       .           no 
 N1      C9      H9B          109.42             .       .       .           no 
 N1      C9      H9C          109.48             .       .       .           no 
 H9A     C9      H9B          109.45             .       .       .           no 
 H9A     C9      H9C          109.50             .       .       .           no 
 H9B     C9      H9C          109.52             .       .       .           no 
 C6      C10     H10A         109.51             .       .       .           no 
 C6      C10     H10B         109.46             .       .       .           no 
 C6      C10     H10C         109.49             .       .       .           no 
 H10A    C10     H10B         109.45             .       .       .           no 
 H10A    C10     H10C         109.48             .       .       .           no 
 H10B    C10     H10C         109.44             .       .       .           no 
 C4      C11     H11A         109.45             .       .       .           no 
 C4      C11     H11B         109.49             .       .       .           no 
 C4      C11     H11C         109.45             .       .       .           no 
 H11A    C11     H11B         109.52             .       .       .           no 
 H11A    C11     H11C         109.43             .       .       .           no 
 H11B    C11     H11C         109.48             .       .       .           no 
 C13     C14     H14          118.82             .       .       .           no 
 C15     C14     H14          118.78             .       .       .           no 
 C15     C16     H16          118.87             .       .       .           no 
 C17     C16     H16          118.96             .       .       .           no 
 N2      C18     H18A         108.71             .       .       .           no 
 N2      C18     H18B         108.73             .       .       .           no 
 C13     C18     H18A         108.81             .       .       .           no 
 C13     C18     H18B         108.85             .       .       .           no 
 H18A    C18     H18B         107.71             .       .       .           no 
 N2      C19     H19A         109.52             .       .       .           no 
 N2      C19     H19B         109.45             .       .       .           no 
 N2      C19     H19C         109.47             .       .       .           no 
 H19A    C19     H19B         109.47             .       .       .           no 
 H19A    C19     H19C         109.50             .       .       .           no 
 H19B    C19     H19C         109.41             .       .       .           no 
 N2      C20     H20A         109.50             .       .       .           no 
 N2      C20     H20B         109.43             .       .       .           no 
 N2      C20     H20C         109.47             .       .       .           no 
 H20A    C20     H20B         109.49             .       .       .           no 
 H20A    C20     H20C         109.46             .       .       .           no 
 H20B    C20     H20C         109.48             .       .       .           no 
 C17     C21     H21A         109.50             .       .       .           no 
 C17     C21     H21B         109.47             .       .       .           no 
 C17     C21     H21C         109.42             .       .       .           no 
 H21A    C21     H21B         109.47             .       .       .           no 
 H21A    C21     H21C         109.53             .       .       .           no 
 H21B    C21     H21C         109.44             .       .       .           no 
 C15     C22     H22A         109.49             .       .       .           no 
 C15     C22     H22B         109.45             .       .       .           no 
 C15     C22     H22C         109.50             .       .       .           no 
 H22A    C22     H22B         109.47             .       .       .           no 
 H22A    C22     H22C         109.51             .       .       .           no 
 H22B    C22     H22C         109.42             .       .       .           no 
 C23     C24     H24          119.46             .       .       .           no 
 C25     C24     H24          119.63             .       .       .           no 
 C24     C25     H25          120.13             .       .       .           no 
 C26     C25     H25          120.25             .       .       .           no 
 C25     C26     H26          119.57             .       .       .           no 
 C27     C26     H26          119.67             .       .       .           no 
 C26     C27     H27          119.78             .       .       .           no 
 C28     C27     H27          119.78             .       .       .           no 
 C23     C28     H28          120.07             .       .       .           no 
 C27     C28     H28          120.16             .       .       .           no 

loop_
_geom_torsion_atom_site_label_1     
_geom_torsion_atom_site_label_2     
_geom_torsion_atom_site_label_3     
_geom_torsion_atom_site_label_4     
_geom_torsion                       
_geom_torsion_site_symmetry_1       
_geom_torsion_site_symmetry_2       
_geom_torsion_site_symmetry_3       
_geom_torsion_site_symmetry_4       
_geom_torsion_publ_flag             
 O2      V1      O1      C1        -101.5(3)     .       .       .       .   no 
 N1      V1      O1      C1         -19.1(3)     .       .       .       .   no 
 N2      V1      O1      C1         175.8(3)     .       .       .       .   no 
 N3      V1      O1      C1          78.2(3)     .       .       .       .   no 
 O1      V1      O2      C12        -97.8(3)     .       .       .       .   no 
 N1      V1      O2      C12        178.9(3)     .       .       .       .   no 
 N2      V1      O2      C12        -15.7(3)     .       .       .       .   no 
 N3      V1      O2      C12         82.5(3)     .       .       .       .   no 
 O1      V1      N1      C7          48.4(2)     .       .       .       .   no 
 O1      V1      N1      C8         -72.6(2)     .       .       .       .   no 
 O1      V1      N1      C9         166.8(2)     .       .       .       .   no 
 O2      V1      N1      C7         178.6(2)     .       .       .       .   no 
 O2      V1      N1      C8          57.6(2)     .       .       .       .   no 
 O2      V1      N1      C9         -63.0(2)     .       .       .       .   no 
 N3      V1      N1      C7         -64.6(2)     .       .       .       .   no 
 N3      V1      N1      C8         174.4(2)     .       .       .       .   no 
 N3      V1      N1      C9          53.8(2)     .       .       .       .   no 
 O1      V1      N2      C18        177.1(2)     .       .       .       .   no 
 O1      V1      N2      C19         55.5(2)     .       .       .       .   no 
 O1      V1      N2      C20        -64.9(2)     .       .       .       .   no 
 O2      V1      N2      C18         46.8(2)     .       .       .       .   no 
 O2      V1      N2      C19        -74.8(2)     .       .       .       .   no 
 O2      V1      N2      C20        164.8(2)     .       .       .       .   no 
 N3      V1      N2      C18        -70.2(2)     .       .       .       .   no 
 N3      V1      N2      C19        168.1(2)     .       .       .       .   no 
 N3      V1      N2      C20         47.8(2)     .       .       .       .   no 
 V1      O1      C1      C2          -1.1(6)     .       .       .       .   no 
 V1      O1      C1      C6         178.6(3)     .       .       .       .   no 
 V1      O2      C12     C13         -3.9(6)     .       .       .       .   no 
 V1      O2      C12     C17        174.4(3)     .       .       .       .   no 
 V1      N1      C7      C2         -65.9(3)     .       .       .       .   no 
 C8      N1      C7      C2          56.7(4)     .       .       .       .   no 
 C9      N1      C7      C2         174.9(3)     .       .       .       .   no 
 V1      N2      C18     C13        -68.0(3)     .       .       .       .   no 
 C19     N2      C18     C13         55.3(3)     .       .       .       .   no 
 C20     N2      C18     C13        173.8(3)     .       .       .       .   no 
 O1      C1      C2      C3         177.3(4)     .       .       .       .   no 
 O1      C1      C2      C7          -4.3(6)     .       .       .       .   no 
 C6      C1      C2      C7         176.0(4)     .       .       .       .   no 
 O1      C1      C6      C5        -178.7(3)     .       .       .       .   no 
 C6      C1      C2      C3          -2.3(6)     .       .       .       .   no 
 C2      C1      C6      C5           1.0(6)     .       .       .       .   no 
 C2      C1      C6      C10        179.8(4)     .       .       .       .   no 
 O1      C1      C6      C10          0.1(6)     .       .       .       .   no 
 C1      C2      C3      C4           2.2(6)     .       .       .       .   no 
 C1      C2      C7      N1          43.6(5)     .       .       .       .   no 
 C3      C2      C7      N1        -138.1(3)     .       .       .       .   no 
 C7      C2      C3      C4        -176.3(4)     .       .       .       .   no 
 C2      C3      C4      C5          -0.6(6)     .       .       .       .   no 
 C2      C3      C4      C11       -179.4(4)     .       .       .       .   no 
 C3      C4      C5      C6          -0.8(6)     .       .       .       .   no 
 C11     C4      C5      C6         178.1(4)     .       .       .       .   no 
 C4      C5      C6      C1           0.6(6)     .       .       .       .   no 
 C4      C5      C6      C10       -178.2(4)     .       .       .       .   no 
 O2      C12     C13     C14        177.9(3)     .       .       .       .   no 
 O2      C12     C13     C18         -5.8(6)     .       .       .       .   no 
 C17     C12     C13     C14         -0.4(6)     .       .       .       .   no 
 C17     C12     C13     C18        176.0(3)     .       .       .       .   no 
 O2      C12     C17     C16       -177.7(3)     .       .       .       .   no 
 O2      C12     C17     C21          3.6(5)     .       .       .       .   no 
 C13     C12     C17     C16          0.7(6)     .       .       .       .   no 
 C13     C12     C17     C21       -178.0(3)     .       .       .       .   no 
 C12     C13     C14     C15         -0.5(6)     .       .       .       .   no 
 C14     C13     C18     N2        -136.4(3)     .       .       .       .   no 
 C12     C13     C18     N2          47.3(5)     .       .       .       .   no 
 C18     C13     C14     C15       -176.9(4)     .       .       .       .   no 
 C13     C14     C15     C16          1.1(6)     .       .       .       .   no 
 C13     C14     C15     C22       -178.6(4)     .       .       .       .   no 
 C22     C15     C16     C17        178.8(4)     .       .       .       .   no 
 C14     C15     C16     C17         -0.8(6)     .       .       .       .   no 
 C15     C16     C17     C12          0.0(6)     .       .       .       .   no 
 C15     C16     C17     C21        178.6(4)     .       .       .       .   no 
 N3      C23     C24     C25        178.7(3)     .       .       .       .   no 
 C24     C23     C28     C27          0.3(5)     .       .       .       .   no 
 C28     C23     C24     C25         -1.2(5)     .       .       .       .   no 
 N3      C23     C28     C27       -179.6(3)     .       .       .       .   no 
 C23     C24     C25     C26          1.3(6)     .       .       .       .   no 
 C24     C25     C26     C27         -0.4(7)     .       .       .       .   no 
 C25     C26     C27     C28         -0.5(7)     .       .       .       .   no 
 C26     C27     C28     C23          0.5(6)     .       .       .       .   no 

loop_
_geom_contact_atom_site_label_1     
_geom_contact_atom_site_label_2     
_geom_contact_distance              
_geom_contact_site_symmetry_1       
_geom_contact_site_symmetry_2       
_geom_contact_publ_flag             
 V1      H24          3.5101                     .       .                   no 
 O1      H8B          2.8620                     .       .                   no 
 O1      H10A         2.6915                     .       .                   no 
 O1      H10B         2.7926                     .       .                   no 
 O1      H19A         2.5342                     .       .                   no 
 O1      H20C         2.6202                     .       .                   no 
 O2      H8C          2.5458                     .       .                   no 
 O2      H9B          2.5975                     .       .                   no 
 O2      H19C         2.9039                     .       .                   no 
 O2      H21A         2.7416                     .       .                   no 
 O2      H21B         2.7188                     .       .                   no 
 N3      H7B          2.8266                     .       .                   no 
 N3      H9C          2.7465                     .       .                   no 
 N3      H18A         2.9205                     .       .                   no 
 N3      H20A         2.6801                     .       .                   no 
 C1      C8         3.332(5)                     .       .                   no 
 C6      C19        3.580(6)                     .     2_655                 no 
 C8      C1         3.332(5)                     .       .                   no 
 C12     C19        3.349(5)                     .       .                   no 
 C19     C6         3.580(6)                     .     2_655                 no 
 C19     C12        3.349(5)                     .       .                   no 
 C1      H8B          2.7376                     .       .                   no 
 C2      H8B          2.5458                     .       .                   no 
 C3      H21C         2.9792                     .     1_655                 no 
 C4      H21C         3.0284                     .     1_655                 no 
 C5      H19C         2.8758                     .     2_655                 no 
 C6      H19C         2.8100                     .     2_655                 no 
 C7      H7B          3.0527                     .     2_656                 no 
 C10     H19C         3.0700                     .     2_655                 no 
 C12     H19C         2.7619                     .       .                   no 
 C13     H19C         2.5434                     .       .                   no 
 C16     H24          3.0855                     .     1_455                 no 
 C16     H5           3.0607                     .     2_655                 no 
 C17     H10C         2.9878                     .     2_655                 no 
 C21     H10C         2.9750                     .     2_655                 no 
 C22     H24          3.0900                     .     1_455                 no 
 C23     H20A         3.0405                     .       .                   no 
 C24     H7B          3.0786                     .       .                   no 
 C28     H3           2.9952                     .     2_656                 no 
 C28     H20B         2.9923                     .     2_665                 no 
 H3      H7A          2.2999                     .       .                   no 
 H3      H11C         2.3599                     .       .                   no 
 H3      C28          2.9952                     .     2_656                 no 
 H5      H10C         2.3456                     .       .                   no 
 H5      C16          3.0607                     .     2_655                 no 
 H7A     H3           2.2999                     .       .                   no 
 H7A     H8A          2.4571                     .       .                   no 
 H7A     H9A          2.3268                     .       .                   no 
 H7B     N3           2.8266                     .       .                   no 
 H7B     C24          3.0786                     .       .                   no 
 H7B     H9C          2.4285                     .       .                   no 
 H7B     C7           3.0527                     .     2_656                 no 
 H8A     H7A          2.4571                     .       .                   no 
 H8A     H9A          2.3720                     .       .                   no 
 H8B     O1           2.8620                     .       .                   no 
 H8B     C1           2.7376                     .       .                   no 
 H8B     C2           2.5458                     .       .                   no 
 H8C     O2           2.5458                     .       .                   no 
 H8C     H9B          2.4107                     .       .                   no 
 H8C     H21B         2.5141                     .       .                   no 
 H9A     H7A          2.3268                     .       .                   no 
 H9A     H8A          2.3720                     .       .                   no 
 H9B     O2           2.5975                     .       .                   no 
 H9B     H8C          2.4107                     .       .                   no 
 H9C     N3           2.7465                     .       .                   no 
 H9C     H7B          2.4285                     .       .                   no 
 H10A    O1           2.6915                     .       .                   no 
 H10A    H22B         2.4869                     .     1_655                 no 
 H10B    O1           2.7926                     .       .                   no 
 H10C    H5           2.3456                     .       .                   no 
 H10C    C17          2.9878                     .     2_655                 no 
 H10C    C21          2.9750                     .     2_655                 no 
 H10C    H21B         2.2935                     .     2_655                 no 
 H11B    H22C         2.5696                     .     2_655                 no 
 H11C    H3           2.3599                     .       .                   no 
 H14     H18B         2.3061                     .       .                   no 
 H14     H22C         2.5290                     .       .                   no 
 H16     H21C         2.3446                     .       .                   no 
 H16     H22B         2.4097                     .       .                   no 
 H16     H24          2.5648                     .     1_455                 no 
 H18A    N3           2.9205                     .       .                   no 
 H18A    H20A         2.4505                     .       .                   no 
 H18B    H14          2.3061                     .       .                   no 
 H18B    H19B         2.4881                     .       .                   no 
 H18B    H20B         2.3276                     .       .                   no 
 H19A    O1           2.5342                     .       .                   no 
 H19A    H20C         2.3927                     .       .                   no 
 H19B    H18B         2.4881                     .       .                   no 
 H19B    H20B         2.3755                     .       .                   no 
 H19C    O2           2.9039                     .       .                   no 
 H19C    C12          2.7619                     .       .                   no 
 H19C    C13          2.5434                     .       .                   no 
 H19C    C5           2.8758                     .     2_655                 no 
 H19C    C6           2.8100                     .     2_655                 no 
 H19C    C10          3.0700                     .     2_655                 no 
 H20A    N3           2.6801                     .       .                   no 
 H20A    C23          3.0405                     .       .                   no 
 H20A    H18A         2.4505                     .       .                   no 
 H20B    H18B         2.3276                     .       .                   no 
 H20B    H19B         2.3755                     .       .                   no 
 H20B    C28          2.9923                     .     2_665                 no 
 H20C    O1           2.6202                     .       .                   no 
 H20C    H19A         2.3927                     .       .                   no 
 H20C    H22B         2.5194                     .     1_655                 no 
 H21A    O2           2.7416                     .       .                   no 
 H21B    O2           2.7188                     .       .                   no 
 H21B    H8C          2.5141                     .       .                   no 
 H21B    H10C         2.2935                     .     2_655                 no 
 H21C    C3           2.9792                     .     1_455                 no 
 H21C    C4           3.0284                     .     1_455                 no 
 H21C    H16          2.3446                     .       .                   no 
 H22B    H10A         2.4869                     .     1_455                 no 
 H22B    H16          2.4097                     .       .                   no 
 H22B    H20C         2.5194                     .     1_455                 no 
 H22C    H14          2.5290                     .       .                   no 
 H22C    H11B         2.5696                     .     2_655                 no 
 H24     V1           3.5101                     .       .                   no 
 H24     C16          3.0855                     .     1_655                 no 
 H24     C22          3.0900                     .     1_655                 no 
 H24     H16          2.5648                     .     1_655                 no 

loop_
_geom_hbond_atom_site_label_D
_geom_hbond_atom_site_label_H
_geom_hbond_atom_site_label_A
_geom_hbond_distance_DH
_geom_hbond_distance_HA
_geom_hbond_distance_DA
_geom_hbond_angle_DHA
_geom_hbond_site_symmetry_A
_geom_hbond_publ_flag
#
#D   H   A   D - H  H...A   D...A    D - H...A  symm(A)
#
C8      H8C     O2          0.9602     2.5458   3.056(5)     113.29     .   yes 
C9      H9B     O2          0.9599     2.5975   3.084(4)     111.65     .   yes 
C19     H19A    O1          0.9594     2.5342   3.038(4)     112.81     .   yes 
#===END

# CIF-file generated for  s2077a   - complex 6-C6H6                              
#===============================================================================

data_s2077a  

#===============================================================================

# 5. CHEMICAL DATA

_chemical_name_systematic           
;
 ?
;
_chemical_formula_moiety            'C28 H37 N3 O2 V, C6 H6'
_chemical_formula_sum               'C34 H43 N3 O2 V'
_chemical_formula_weight                576.65
_chemical_compound_source           'see text'

loop_
_atom_type_symbol                   
_atom_type_description              
_atom_type_scat_dispersion_real     
_atom_type_scat_dispersion_imag     
_atom_type_scat_source              
 V   V    0.3005    0.5294
 'International Tables Vol C Tables 4.2.6.8 and 6.1.1.4'
 O   O    0.0106    0.0060
 'International Tables Vol C Tables 4.2.6.8 and 6.1.1.4'
 N   N    0.0061    0.0033
 'International Tables Vol C Tables 4.2.6.8 and 6.1.1.4'
 H   H    0.0000    0.0000
 'International Tables Vol C Tables 4.2.6.8 and 6.1.1.4'
 C   C    0.0033    0.0016
 'International Tables Vol C Tables 4.2.6.8 and 6.1.1.4'

#===============================================================================

# 6. CRYSTAL DATA

_symmetry_cell_setting                  Triclinic
_symmetry_space_group_name_Hall      '-P 1'
_symmetry_space_group_name_H-M       'P -1'

loop_
_symmetry_equiv_pos_as_xyz          
 x,y,z                         
 -x,-y,-z                      

_cell_length_a                           8.6034(3)
_cell_length_b                          13.3614(4)
_cell_length_c                          15.1044(5)
_cell_angle_alpha                        98.182(3)
_cell_angle_beta                        105.618(2)
_cell_angle_gamma                       107.130(2)
_cell_volume                           1551.0(1)
_cell_formula_units_Z                    2
_cell_measurement_temperature          150

_exptl_crystal_description          plate 
_exptl_crystal_colour               brown 
_exptl_crystal_size_max                  0.270
_exptl_crystal_size_mid                  0.210
_exptl_crystal_size_min                  0.030
_exptl_crystal_density_diffrn            1.235
_exptl_crystal_density_method       'Not Measured'
_exptl_crystal_F_000                       614
_exptl_absorpt_coefficient_mu            0.354
_exptl_absorpt_correction_type      none 

#===============================================================================

# 7. EXPERIMENTAL DATA

_exptl_special_details              
; ?
;
_diffrn_ambient_temperature         150 
_diffrn_radiation_wavelength           0.71073
_diffrn_radiation_type               'Mo K\a'
_diffrn_radiation_source            'Rotating Anode' 
_diffrn_radiation_monochromator     'graphite' 

_diffrn_measurement_device_type     'Kappa-CCD' 
_diffrn_measurement_method          'scans' 

# number of measured reflections (redundant set)
_diffrn_reflns_number                18775
_diffrn_reflns_av_R_equivalents       0.0530
_diffrn_reflns_av_sigmaI/netI         0.0481
_diffrn_reflns_limit_h_min             -10
_diffrn_reflns_limit_h_max              10
_diffrn_reflns_limit_k_min             -15
_diffrn_reflns_limit_k_max              15
_diffrn_reflns_limit_l_min             -17
_diffrn_reflns_limit_l_max              17
_diffrn_reflns_theta_min              1.64
_diffrn_reflns_theta_max             24.97

# number of unique reflections
_reflns_number_total                    5418
# number of observed reflections (> n sig(I))
_reflns_number_gt                       4437
_reflns_threshold_expression         i>2\s(i)   

_computing_structure_refinement      'SHELXL-97 (Sheldrick, 1997)'
_computing_publication_material      'PLATON (Spek, 1990)' 

#===============================================================================

# 8. REFINEMENT DATA

_refine_special_details             
;
 Refinement on F^2 for ALL reflections except those
 flagged by the user for potential systematic errors.
 Weighted R-factors wR and all goodnesses of fit S
 are based on F^2, conventional R-factors R are based
 on F, with F set to zero for negative F^2. The
 observed criterion of F^2 > 2sigma(F^2) is used only
 for calculating -R-factor-obs etc. and is not
 relevant to the choice of reflections for refinement.
 R-factors based on F^2 are statistically about twice
 as large as those based on F, and R-factors based on
 ALL data will be even larger.
;
_refine_ls_structure_factor_coef     Fsqd       
_refine_ls_matrix_type               full       
_refine_ls_weighting_scheme          'calc       '
_refine_ls_weighting_details        
'calc w=1/[\s^2^(Fo^2^)+(0.0671P)^2^+2.4593P] where P=(Fo^2^+2Fc^2^)/3'         
_refine_ls_hydrogen_treatment        'H-atom refinement: see text ' 
_refine_ls_extinction_method         none       
_refine_ls_abs_structure_details     none
_refine_ls_abs_structure_Flack       none
_refine_ls_number_reflns                  5418
_refine_ls_number_parameters               361
_refine_ls_number_restraints                 0
_refine_ls_R_factor_all                 0.0739
_refine_ls_R_factor_gt                  0.0575
_refine_ls_wR_factor_ref                0.1590
_refine_ls_wR_factor_gt                 0.1489
_refine_ls_goodness_of_fit_ref           1.056
_refine_ls_restrained_S_all              1.056
_refine_ls_shift/su_max                  0.004
_refine_ls_shift/su_mean                 0.000
_refine_diff_density_max                 0.536
_refine_diff_density_min                -0.507
_refine_diff_density_rms                 0.067

#===============================================================================

# 9. ATOMIC COORDINATES AND THERMAL PARAMETERS

loop_
_atom_site_label                    
_atom_site_type_symbol              
_atom_site_thermal_displace_type    
_atom_site_fract_x                  
_atom_site_fract_y                  
_atom_site_fract_z                  
_atom_site_occupancy                
_atom_site_U_iso_or_equiv           
 V1     V  Uani    0.11809(7)   0.76161(4)   0.16768(4)     1.000    0.0251(2)  
 O1     O  Uani     0.1112(3)  0.62987(17)  0.20323(16)     1.000    0.0297(7)  
 O2     O  Uani     0.2935(3)  0.89903(17)  0.23054(16)     1.000    0.0286(7)  
 N1     N  Uani     0.0014(3)    0.7953(2)    0.2736(2)     1.000    0.0291(9)  
 N2     N  Uani     0.2805(3)    0.7320(2)  0.08574(19)     1.000    0.0273(8)  
 N3     N  Uani    -0.0486(3)    0.7537(2)    0.0747(2)     1.000    0.0329(9)  
 C1     C  Uani     0.0260(4)    0.5735(2)    0.2535(2)     1.000   0.0277(10)  
 C2     C  Uani    -0.0965(4)    0.6036(3)    0.2856(2)     1.000   0.0302(10)  
 C3     C  Uani    -0.1755(4)    0.5442(3)    0.3406(2)     1.000   0.0347(11)  
 C4     C  Uani    -0.1388(5)    0.4551(3)    0.3637(3)     1.000   0.0380(11)  
 C5     C  Uani    -0.0181(5)    0.4269(3)    0.3315(3)     1.000   0.0360(11)  
 C6     C  Uani     0.0670(4)    0.4840(3)    0.2774(2)     1.000   0.0309(10)  
 C7     C  Uani    -0.1474(4)    0.6966(3)    0.2605(3)     1.000   0.0321(10)  
 C8     C  Uani     0.1209(4)    0.8263(3)    0.3722(2)     1.000   0.0326(11)  
 C9     C  Uani    -0.0634(5)    0.8854(3)    0.2572(3)     1.000   0.0385(12)  
 C10    C  Uani     0.1979(5)    0.4512(3)    0.2437(3)     1.000   0.0368(11)  
 C11    C  Uani    -0.2269(6)    0.3926(3)    0.4238(3)     1.000   0.0514(14)  
 C12    C  Uani     0.4383(4)    0.9560(2)    0.2158(2)     1.000    0.0254(9)  
 C13    C  Uani     0.4732(4)    0.9267(2)    0.1322(2)     1.000    0.0263(9)  
 C14    C  Uani     0.6265(4)    0.9873(3)    0.1217(2)     1.000   0.0281(10)  
 C15    C  Uani     0.7467(4)    1.0763(3)    0.1913(2)     1.000   0.0303(10)  
 C16    C  Uani     0.7090(4)    1.1053(2)    0.2734(2)     1.000   0.0299(10)  
 C17    C  Uani     0.5574(4)    1.0471(2)    0.2870(2)     1.000   0.0275(10)  
 C18    C  Uani     0.3461(4)    0.8314(3)    0.0534(2)     1.000   0.0300(10)  
 C19    C  Uani     0.4272(4)    0.7040(3)    0.1397(2)     1.000   0.0314(11)  
 C20    C  Uani     0.1759(4)    0.6425(3)    0.0015(2)     1.000   0.0359(11)  
 C21    C  Uani     0.5171(5)    1.0818(3)    0.3753(3)     1.000   0.0358(11)  
 C22    C  Uani     0.9134(4)    1.1399(3)    0.1783(3)     1.000   0.0402(11)  
 C23    C  Uani    -0.1942(4)    0.7375(3)    0.0002(2)     1.000   0.0294(10)  
 C24    C  Uani    -0.3240(5)    0.6344(3)   -0.0374(3)     1.000   0.0415(12)  
 C25    C  Uani    -0.4701(5)    0.6182(4)   -0.1114(3)     1.000   0.0556(14)  
 C26    C  Uani    -0.4913(6)    0.7017(5)   -0.1507(3)     1.000   0.0645(18)  
 C27    C  Uani    -0.3682(6)    0.8032(4)   -0.1159(3)     1.000   0.0578(18)  
 C28    C  Uani    -0.2189(5)    0.8213(3)   -0.0403(3)     1.000   0.0403(12)  
 C29    C  Uani     0.4168(6)    0.1767(3)    0.5906(3)     1.000   0.0503(16)  
 C30    C  Uani     0.4917(5)    0.2777(4)    0.5842(4)     1.000   0.0574(16)  
 C31    C  Uani    0.4021(10)    0.3170(4)    0.5136(5)     1.000     0.089(3)  
 C32    C  Uani    0.2358(11)    0.2464(8)    0.4543(4)     1.000     0.098(3)  
 C33    C  Uani     0.1723(7)    0.1484(6)    0.4658(5)     1.000     0.085(2)  
 C34    C  Uani     0.2580(7)    0.1137(4)    0.5305(4)     1.000   0.0636(17)  
 H3     H  Uiso      -0.25700      0.56570      0.36270     1.000       0.0420  
 H5     H  Uiso       0.00840      0.36600      0.34680     1.000       0.0430  
 H7A    H  Uiso      -0.22280      0.67450      0.19350     1.000       0.0390  
 H7B    H  Uiso      -0.21510      0.71410      0.30010     1.000       0.0390  
 H8A    H  Uiso       0.21900      0.89120      0.38040     1.000       0.0490  
 H8B    H  Uiso       0.16230      0.76730      0.38510     1.000       0.0490  
 H8C    H  Uiso       0.06040      0.84110      0.41620     1.000       0.0490  
 H9A    H  Uiso      -0.14250      0.86660      0.19220     1.000       0.0580  
 H9B    H  Uiso       0.03400      0.95120      0.26690     1.000       0.0580  
 H9C    H  Uiso      -0.12420      0.89740      0.30170     1.000       0.0580  
 H10A   H  Uiso       0.24240      0.50060      0.20690     1.000       0.0550  
 H10B   H  Uiso       0.14380      0.37750      0.20380     1.000       0.0550  
 H10C   H  Uiso       0.29300      0.45430      0.29840     1.000       0.0550  
 H11A   H  Uiso      -0.30820      0.42460      0.43900     1.000       0.0770  
 H11B   H  Uiso      -0.14020      0.39570      0.48250     1.000       0.0770  
 H11C   H  Uiso      -0.28920      0.31720      0.38850     1.000       0.0770  
 H14    H  Uiso       0.64930      0.96700      0.06500     1.000       0.0340  
 H16    H  Uiso       0.78910      1.16670      0.32140     1.000       0.0360  
 H18A   H  Uiso       0.24730      0.85120      0.02100     1.000       0.0360  
 H18B   H  Uiso       0.40210      0.81550      0.00650     1.000       0.0360  
 H19A   H  Uiso       0.49790      0.76210      0.19650     1.000       0.0470  
 H19B   H  Uiso       0.49740      0.69460      0.09990     1.000       0.0470  
 H19C   H  Uiso       0.38290      0.63670      0.15840     1.000       0.0470  
 H20A   H  Uiso       0.13180      0.57620      0.02150     1.000       0.0540  
 H20B   H  Uiso       0.24730      0.63210     -0.03730     1.000       0.0540  
 H20C   H  Uiso       0.07910      0.65970     -0.03580     1.000       0.0540  
 H21A   H  Uiso       0.40650      1.03100      0.37270     1.000       0.0540  
 H21B   H  Uiso       0.51050      1.15420      0.37920     1.000       0.0540  
 H21C   H  Uiso       0.60810      1.08280      0.43110     1.000       0.0540  
 H22A   H  Uiso       0.98160      1.19960      0.23430     1.000       0.0600  
 H22B   H  Uiso       0.88730      1.16890      0.12220     1.000       0.0600  
 H22C   H  Uiso       0.97890      1.09250      0.17010     1.000       0.0600  
 H24    H  Uiso      -0.31020      0.57570     -0.01130     1.000       0.0490  
 H25    H  Uiso      -0.55690      0.54870     -0.13550     1.000       0.0660  
 H26    H  Uiso      -0.59200      0.68930     -0.20240     1.000       0.0780  
 H27    H  Uiso      -0.38430      0.86080     -0.14310     1.000       0.0690  
 H28    H  Uiso      -0.13370      0.89150     -0.01650     1.000       0.0480  
 H29    H  Uiso       0.47620      0.14890      0.63810     1.000       0.0600  
 H30    H  Uiso       0.60300      0.32150      0.62660     1.000       0.0690  
 H31    H  Uiso       0.45040      0.38760      0.50580     1.000       0.1070  
 H32    H  Uiso       0.16970      0.27000      0.40590     1.000       0.1180  
 H33    H  Uiso       0.06070      0.10240      0.42540     1.000       0.1020  
 H34    H  Uiso       0.20880      0.04230      0.53630     1.000       0.0760  

loop_
_atom_site_aniso_label              
_atom_site_aniso_U_11               
_atom_site_aniso_U_22               
_atom_site_aniso_U_33               
_atom_site_aniso_U_23               
_atom_site_aniso_U_13               
_atom_site_aniso_U_12               
  V1       0.0191(3)  0.0283(3)  0.0279(3)   0.0077(2)   0.0068(2)   0.0085(2)  
  O1      0.0262(12) 0.0293(12) 0.0378(14)  0.0098(10)  0.0151(10)  0.0109(10)  
  O2      0.0261(12) 0.0284(11) 0.0290(12)  0.0051(10)  0.0119(10)   0.0046(9)  
  N1      0.0244(14) 0.0292(14) 0.0390(17)  0.0109(12)  0.0142(13)  0.0123(12)  
  N2      0.0231(14) 0.0278(14) 0.0283(15)  0.0039(11)  0.0076(12)  0.0071(11)  
  N3      0.0258(15) 0.0438(17) 0.0310(16)  0.0095(13)  0.0084(13)  0.0154(13)  
  C1      0.0212(16) 0.0247(16) 0.0314(18)  0.0055(14)  0.0079(14)  0.0011(13)  
  C2      0.0225(16) 0.0295(17) 0.0333(19)  0.0033(14)  0.0085(14)  0.0040(13)  
  C3      0.0294(18) 0.0344(18)   0.035(2)  0.0036(15)  0.0141(16)  0.0026(15)  
  C4        0.042(2) 0.0289(18)   0.035(2)  0.0052(15)  0.0152(17) -0.0003(15)  
  C5        0.042(2) 0.0246(17)   0.037(2)  0.0074(15)  0.0118(17)  0.0064(15)  
  C6      0.0286(17) 0.0258(17) 0.0324(19)  0.0023(14)  0.0069(15)  0.0063(14)  
  C7      0.0208(16) 0.0373(18)   0.041(2)  0.0102(16)  0.0152(15)  0.0092(14)  
  C8      0.0293(18) 0.0353(18) 0.0340(19)  0.0061(15)  0.0141(15)  0.0101(15)  
  C9        0.040(2)   0.038(2)   0.052(2)  0.0155(18)  0.0236(19)  0.0242(17)  
  C10       0.038(2) 0.0273(17)   0.048(2)  0.0108(16)  0.0152(17)  0.0138(15)  
  C11       0.066(3)   0.038(2)   0.048(2)  0.0123(18)    0.030(2)  0.0040(19)  
  C12     0.0246(16) 0.0260(16) 0.0289(17)  0.0109(13)  0.0101(14)  0.0103(13)  
  C13     0.0275(17) 0.0279(16) 0.0227(16)  0.0076(13)  0.0064(13)  0.0097(14)  
  C14     0.0299(17) 0.0316(17) 0.0244(17)  0.0093(14)  0.0110(14)  0.0099(14)  
  C15     0.0283(18) 0.0315(17) 0.0335(19)  0.0162(15)  0.0119(15)  0.0084(14)  
  C16     0.0321(18) 0.0222(16) 0.0306(18)  0.0060(14)  0.0067(15)  0.0059(14)  
  C17     0.0302(17) 0.0261(16) 0.0269(17)  0.0090(13)  0.0102(14)  0.0090(14)  
  C18     0.0288(17) 0.0342(18) 0.0244(17)  0.0065(14)  0.0095(14)  0.0069(14)  
  C19     0.0242(17) 0.0349(18)   0.037(2)  0.0080(15)  0.0107(15)  0.0126(14)  
  C20     0.0293(18) 0.0347(19)   0.033(2) -0.0032(15)  0.0080(15)  0.0035(15)  
  C21       0.038(2) 0.0297(18)   0.035(2)  0.0026(15)  0.0146(16)  0.0053(15)  
  C22     0.0311(19)   0.043(2)   0.039(2)  0.0103(17)  0.0138(17)  0.0000(16)  
  C23     0.0245(17) 0.0440(19) 0.0239(17)  0.0068(15)  0.0097(14)  0.0168(15)  
  C24       0.034(2)   0.046(2)   0.042(2)  0.0012(17)  0.0158(17)  0.0120(17)  
  C25       0.033(2)   0.071(3)   0.044(2)   -0.012(2)  0.0064(19)    0.009(2)  
  C26       0.044(3)   0.108(4)   0.034(2)   -0.007(3)    0.002(2)    0.037(3)  
  C27       0.069(3)   0.089(4)   0.039(2)    0.026(2)    0.019(2)    0.055(3)  
  C28       0.046(2)   0.052(2)   0.034(2)  0.0145(17)  0.0183(17)  0.0264(19)  
  C29       0.075(3)   0.055(3)   0.027(2)  0.0078(18)    0.014(2)    0.035(2)  
  C30       0.035(2)   0.051(3)   0.079(3)   -0.009(2)    0.020(2)  0.0152(19)  
  C31       0.144(6)   0.059(3)   0.140(6)    0.057(4)    0.117(5)    0.063(4)  
  C32       0.124(6)   0.182(8)   0.048(3)    0.045(4)    0.027(4)    0.130(6)  
  C33       0.046(3)   0.122(5)   0.069(4)   -0.024(4)    0.004(3)    0.039(4)  
  C34       0.064(3)   0.058(3)   0.068(3)   -0.002(3)    0.046(3)    0.006(2)  

#===============================================================================

# 10. MOLECULAR GEOMETRY

_geom_special_details               
;
 Bond distances, angles etc. have been calculated using the
 rounded fractional coordinates. All esds are estimated
 from the variances of the (full) variance-covariance matrix.
 The cell esds are taken into account in the estimation of
 distances, angles and torsion angles
;

loop_
_geom_bond_atom_site_label_1        
_geom_bond_atom_site_label_2        
_geom_bond_distance                 
_geom_bond_site_symmetry_1          
_geom_bond_site_symmetry_2          
_geom_bond_publ_flag                
 V1      O1         1.901(2)                     .       .                   yes
 V1      O2         1.911(2)                     .       .                   yes
 V1      N1         2.167(3)                     .       .                   yes
 V1      N2         2.181(3)                     .       .                   yes
 V1      N3         1.681(3)                     .       .                   yes
 O1      C1         1.348(4)                     .       .                   yes
 O2      C12        1.349(4)                     .       .                   yes
 N1      C7         1.487(5)                     .       .                   yes
 N1      C8         1.482(4)                     .       .                   yes
 N1      C9         1.492(5)                     .       .                   yes
 N2      C18        1.487(5)                     .       .                   yes
 N2      C19        1.486(4)                     .       .                   yes
 N2      C20        1.475(4)                     .       .                   yes
 N3      C23        1.376(4)                     .       .                   yes
 C1      C2         1.406(5)                     .       .                   no 
 C1      C6         1.410(5)                     .       .                   no 
 C2      C3         1.399(5)                     .       .                   no 
 C2      C7         1.498(5)                     .       .                   no 
 C3      C4         1.385(6)                     .       .                   no 
 C4      C5         1.381(6)                     .       .                   no 
 C4      C11        1.520(6)                     .       .                   no 
 C5      C6         1.399(6)                     .       .                   no 
 C6      C10        1.502(6)                     .       .                   no 
 C12     C13        1.404(4)                     .       .                   no 
 C12     C17        1.410(4)                     .       .                   no 
 C13     C14        1.393(5)                     .       .                   no 
 C13     C18        1.510(4)                     .       .                   no 
 C14     C15        1.387(5)                     .       .                   no 
 C15     C16        1.395(4)                     .       .                   no 
 C15     C22        1.516(5)                     .       .                   no 
 C16     C17        1.393(5)                     .       .                   no 
 C17     C21        1.511(5)                     .       .                   no 
 C23     C24        1.413(6)                     .       .                   no 
 C23     C28        1.392(6)                     .       .                   no 
 C24     C25        1.375(6)                     .       .                   no 
 C25     C26        1.371(8)                     .       .                   no 
 C26     C27        1.374(8)                     .       .                   no 
 C27     C28        1.400(7)                     .       .                   no 
 C3      H3           0.9503                     .       .                   no 
 C5      H5           0.9497                     .       .                   no 
 C7      H7A          0.9903                     .       .                   no 
 C7      H7B          0.9898                     .       .                   no 
 C8      H8A          0.9806                     .       .                   no 
 C8      H8B          0.9788                     .       .                   no 
 C8      H8C          0.9804                     .       .                   no 
 C9      H9A          0.9795                     .       .                   no 
 C9      H9B          0.9797                     .       .                   no 
 C9      H9C          0.9794                     .       .                   no 
 C10     H10A         0.9805                     .       .                   no 
 C10     H10B         0.9796                     .       .                   no 
 C10     H10C         0.9798                     .       .                   no 
 C11     H11A         0.9795                     .       .                   no 
 C11     H11B         0.9795                     .       .                   no 
 C11     H11C         0.9806                     .       .                   no 
 C14     H14          0.9493                     .       .                   no 
 C16     H16          0.9499                     .       .                   no 
 C18     H18A         0.9886                     .       .                   no 
 C18     H18B         0.9901                     .       .                   no 
 C19     H19A         0.9798                     .       .                   no 
 C19     H19B         0.9801                     .       .                   no 
 C19     H19C         0.9808                     .       .                   no 
 C20     H20A         0.9797                     .       .                   no 
 C20     H20B         0.9803                     .       .                   no 
 C20     H20C         0.9802                     .       .                   no 
 C21     H21A         0.9795                     .       .                   no 
 C21     H21B         0.9800                     .       .                   no 
 C21     H21C         0.9792                     .       .                   no 
 C22     H22A         0.9803                     .       .                   no 
 C22     H22B         0.9802                     .       .                   no 
 C22     H22C         0.9795                     .       .                   no 
 C24     H24          0.9499                     .       .                   no 
 C25     H25          0.9494                     .       .                   no 
 C26     H26          0.9498                     .       .                   no 
 C27     H27          0.9500                     .       .                   no 
 C28     H28          0.9505                     .       .                   no 
 C29     C30        1.343(7)                     .       .                   no 
 C29     C34        1.355(8)                     .       .                   no 
 C30     C31        1.401(9)                     .       .                   no 
 C31     C32       1.419(12)                     .       .                   no 
 C32     C33       1.318(13)                     .       .                   no 
 C33     C34        1.287(9)                     .       .                   no 
 C29     H29          0.9509                     .       .                   no 
 C30     H30          0.9500                     .       .                   no 
 C31     H31          0.9505                     .       .                   no 
 C32     H32          0.9511                     .       .                   no 
 C33     H33          0.9498                     .       .                   no 
 C34     H34          0.9502                     .       .                   no 

loop_
_geom_angle_atom_site_label_1       
_geom_angle_atom_site_label_2       
_geom_angle_atom_site_label_3       
_geom_angle                         
_geom_angle_site_symmetry_1         
_geom_angle_site_symmetry_2         
_geom_angle_site_symmetry_3         
_geom_angle_publ_flag               
 O1      V1      O2       125.37(11)             .       .       .           yes
 O1      V1      N1        87.90(11)             .       .       .           yes
 O1      V1      N2        87.72(11)             .       .       .           yes
 O1      V1      N3       115.73(12)             .       .       .           yes
 O2      V1      N1        85.83(11)             .       .       .           yes
 O2      V1      N2        87.94(11)             .       .       .           yes
 O2      V1      N3       118.88(12)             .       .       .           yes
 N1      V1      N2       168.38(11)             .       .       .           yes
 N1      V1      N3        95.41(13)             .       .       .           yes
 N2      V1      N3        96.18(12)             .       .       .           yes
 V1      O1      C1         133.0(2)             .       .       .           yes
 V1      O2      C12        133.7(2)             .       .       .           yes
 V1      N1      C7         107.4(2)             .       .       .           yes
 V1      N1      C8         113.7(2)             .       .       .           yes
 V1      N1      C9         108.9(2)             .       .       .           yes
 C7      N1      C8         109.7(3)             .       .       .           yes
 C7      N1      C9         108.8(3)             .       .       .           yes
 C8      N1      C9         108.1(3)             .       .       .           yes
 V1      N2      C18        107.3(2)             .       .       .           yes
 V1      N2      C19      113.60(19)             .       .       .           yes
 V1      N2      C20        109.5(2)             .       .       .           yes
 C18     N2      C19        109.9(3)             .       .       .           yes
 C18     N2      C20        108.4(2)             .       .       .           yes
 C19     N2      C20        108.1(3)             .       .       .           yes
 V1      N3      C23        174.2(3)             .       .       .           yes
 O1      C1      C2         122.2(3)             .       .       .           yes
 O1      C1      C6         118.4(3)             .       .       .           yes
 C2      C1      C6         119.4(3)             .       .       .           no 
 C1      C2      C3         119.4(3)             .       .       .           no 
 C1      C2      C7         121.5(3)             .       .       .           no 
 C3      C2      C7         119.1(3)             .       .       .           no 
 C2      C3      C4         122.1(4)             .       .       .           no 
 C3      C4      C5         117.6(4)             .       .       .           no 
 C3      C4      C11        120.6(4)             .       .       .           no 
 C5      C4      C11        121.8(4)             .       .       .           no 
 C4      C5      C6         123.0(4)             .       .       .           no 
 C1      C6      C5         118.5(3)             .       .       .           no 
 C1      C6      C10        119.9(3)             .       .       .           no 
 C5      C6      C10        121.6(4)             .       .       .           no 
 N1      C7      C2         113.7(3)             .       .       .           yes
 O2      C12     C13        121.9(3)             .       .       .           yes
 O2      C12     C17        118.6(3)             .       .       .           yes
 C13     C12     C17        119.6(3)             .       .       .           no 
 C12     C13     C14        119.3(3)             .       .       .           no 
 C12     C13     C18        120.9(3)             .       .       .           no 
 C14     C13     C18        119.8(3)             .       .       .           no 
 C13     C14     C15        122.2(3)             .       .       .           no 
 C14     C15     C16        117.8(3)             .       .       .           no 
 C14     C15     C22        120.9(3)             .       .       .           no 
 C16     C15     C22        121.2(3)             .       .       .           no 
 C15     C16     C17        122.0(3)             .       .       .           no 
 C12     C17     C16        119.1(3)             .       .       .           no 
 C12     C17     C21        119.8(3)             .       .       .           no 
 C16     C17     C21        121.1(3)             .       .       .           no 
 N2      C18     C13        114.0(2)             .       .       .           yes
 N3      C23     C24        120.6(3)             .       .       .           yes
 N3      C23     C28        121.5(3)             .       .       .           yes
 C24     C23     C28        117.9(3)             .       .       .           no 
 C23     C24     C25        120.7(4)             .       .       .           no 
 C24     C25     C26        120.5(5)             .       .       .           no 
 C25     C26     C27        120.6(5)             .       .       .           no 
 C26     C27     C28        119.7(5)             .       .       .           no 
 C23     C28     C27        120.6(4)             .       .       .           no 
 C2      C3      H3           118.84             .       .       .           no 
 C4      C3      H3           119.08             .       .       .           no 
 C4      C5      H5           118.53             .       .       .           no 
 C6      C5      H5           118.49             .       .       .           no 
 N1      C7      H7A          108.82             .       .       .           no 
 N1      C7      H7B          108.82             .       .       .           no 
 C2      C7      H7A          108.78             .       .       .           no 
 C2      C7      H7B          108.89             .       .       .           no 
 H7A     C7      H7B          107.69             .       .       .           no 
 N1      C8      H8A          109.37             .       .       .           no 
 N1      C8      H8B          109.49             .       .       .           no 
 N1      C8      H8C          109.45             .       .       .           no 
 H8A     C8      H8B          109.48             .       .       .           no 
 H8A     C8      H8C          109.50             .       .       .           no 
 H8B     C8      H8C          109.53             .       .       .           no 
 N1      C9      H9A          109.45             .       .       .           no 
 N1      C9      H9B          109.41             .       .       .           no 
 N1      C9      H9C          109.44             .       .       .           no 
 H9A     C9      H9B          109.50             .       .       .           no 
 H9A     C9      H9C          109.45             .       .       .           no 
 H9B     C9      H9C          109.57             .       .       .           no 
 C6      C10     H10A         109.41             .       .       .           no 
 C6      C10     H10B         109.49             .       .       .           no 
 C6      C10     H10C         109.48             .       .       .           no 
 H10A    C10     H10B         109.49             .       .       .           no 
 H10A    C10     H10C         109.42             .       .       .           no 
 H10B    C10     H10C         109.53             .       .       .           no 
 C4      C11     H11A         109.41             .       .       .           no 
 C4      C11     H11B         109.47             .       .       .           no 
 C4      C11     H11C         109.43             .       .       .           no 
 H11A    C11     H11B         109.50             .       .       .           no 
 H11A    C11     H11C         109.47             .       .       .           no 
 H11B    C11     H11C         109.53             .       .       .           no 
 C13     C14     H14          118.87             .       .       .           no 
 C15     C14     H14          118.97             .       .       .           no 
 C15     C16     H16          118.95             .       .       .           no 
 C17     C16     H16          119.03             .       .       .           no 
 N2      C18     H18A         108.75             .       .       .           no 
 N2      C18     H18B         108.72             .       .       .           no 
 C13     C18     H18A         108.80             .       .       .           no 
 C13     C18     H18B         108.75             .       .       .           no 
 H18A    C18     H18B         107.64             .       .       .           no 
 N2      C19     H19A         109.48             .       .       .           no 
 N2      C19     H19B         109.53             .       .       .           no 
 N2      C19     H19C         109.43             .       .       .           no 
 H19A    C19     H19B         109.51             .       .       .           no 
 H19A    C19     H19C         109.38             .       .       .           no 
 H19B    C19     H19C         109.49             .       .       .           no 
 N2      C20     H20A         109.49             .       .       .           no 
 N2      C20     H20B         109.48             .       .       .           no 
 N2      C20     H20C         109.52             .       .       .           no 
 H20A    C20     H20B         109.46             .       .       .           no 
 H20A    C20     H20C         109.47             .       .       .           no 
 H20B    C20     H20C         109.40             .       .       .           no 
 C17     C21     H21A         109.46             .       .       .           no 
 C17     C21     H21B         109.40             .       .       .           no 
 C17     C21     H21C         109.46             .       .       .           no 
 H21A    C21     H21B         109.44             .       .       .           no 
 H21A    C21     H21C         109.56             .       .       .           no 
 H21B    C21     H21C         109.51             .       .       .           no 
 C15     C22     H22A         109.41             .       .       .           no 
 C15     C22     H22B         109.44             .       .       .           no 
 C15     C22     H22C         109.50             .       .       .           no 
 H22A    C22     H22B         109.39             .       .       .           no 
 H22A    C22     H22C         109.51             .       .       .           no 
 H22B    C22     H22C         109.57             .       .       .           no 
 C23     C24     H24          119.68             .       .       .           no 
 C25     C24     H24          119.66             .       .       .           no 
 C24     C25     H25          119.78             .       .       .           no 
 C26     C25     H25          119.75             .       .       .           no 
 C25     C26     H26          119.72             .       .       .           no 
 C27     C26     H26          119.69             .       .       .           no 
 C26     C27     H27          120.11             .       .       .           no 
 C28     C27     H27          120.17             .       .       .           no 
 C23     C28     H28          119.78             .       .       .           no 
 C27     C28     H28          119.59             .       .       .           no 
 C30     C29     C34        121.1(5)             .       .       .           no 
 C29     C30     C31        118.5(5)             .       .       .           no 
 C30     C31     C32        116.8(6)             .       .       .           no 
 C31     C32     C33        120.5(7)             .       .       .           no 
 C32     C33     C34        121.5(7)             .       .       .           no 
 C29     C34     C33        121.5(6)             .       .       .           no 
 C30     C29     H29          119.45             .       .       .           no 
 C34     C29     H29          119.41             .       .       .           no 
 C29     C30     H30          120.73             .       .       .           no 
 C31     C30     H30          120.74             .       .       .           no 
 C30     C31     H31          121.58             .       .       .           no 
 C32     C31     H31          121.59             .       .       .           no 
 C31     C32     H32          119.72             .       .       .           no 
 C33     C32     H32          119.78             .       .       .           no 
 C32     C33     H33          119.20             .       .       .           no 
 C34     C33     H33          119.29             .       .       .           no 
 C29     C34     H34          119.24             .       .       .           no 
 C33     C34     H34          119.26             .       .       .           no 

loop_
_geom_torsion_atom_site_label_1     
_geom_torsion_atom_site_label_2     
_geom_torsion_atom_site_label_3     
_geom_torsion_atom_site_label_4     
_geom_torsion                       
_geom_torsion_site_symmetry_1       
_geom_torsion_site_symmetry_2       
_geom_torsion_site_symmetry_3       
_geom_torsion_site_symmetry_4       
_geom_torsion_publ_flag             
 O2      V1      O1      C1          98.9(3)     .       .       .       .   no 
 N1      V1      O1      C1          15.5(3)     .       .       .       .   no 
 N2      V1      O1      C1        -175.3(3)     .       .       .       .   no 
 N3      V1      O1      C1         -79.5(3)     .       .       .       .   no 
 O1      V1      O2      C12         95.5(3)     .       .       .       .   no 
 N1      V1      O2      C12          180(2)     .       .       .       .   no 
 N2      V1      O2      C12          9.8(3)     .       .       .       .   no 
 N3      V1      O2      C12        -86.1(3)     .       .       .       .   no 
 O1      V1      N1      C7         -47.9(2)     .       .       .       .   no 
 O1      V1      N1      C8          73.7(2)     .       .       .       .   no 
 O1      V1      N1      C9        -165.6(2)     .       .       .       .   no 
 O2      V1      N1      C7        -173.6(2)     .       .       .       .   no 
 O2      V1      N1      C8         -52.0(2)     .       .       .       .   no 
 O2      V1      N1      C9          68.7(2)     .       .       .       .   no 
 N3      V1      N1      C7          67.7(2)     .       .       .       .   no 
 N3      V1      N1      C8        -170.7(2)     .       .       .       .   no 
 N3      V1      N1      C9         -50.0(2)     .       .       .       .   no 
 O1      V1      N2      C18       -171.0(2)     .       .       .       .   no 
 O1      V1      N2      C19        -49.3(2)     .       .       .       .   no 
 O1      V1      N2      C20         71.6(2)     .       .       .       .   no 
 O2      V1      N2      C18        -45.4(2)     .       .       .       .   no 
 O2      V1      N2      C19         76.2(2)     .       .       .       .   no 
 O2      V1      N2      C20       -162.9(2)     .       .       .       .   no 
 N3      V1      N2      C18         73.4(2)     .       .       .       .   no 
 N3      V1      N2      C19       -164.9(2)     .       .       .       .   no 
 N3      V1      N2      C20        -44.0(2)     .       .       .       .   no 
 V1      O1      C1      C2           5.5(4)     .       .       .       .   no 
 V1      O1      C1      C6        -172.0(2)     .       .       .       .   no 
 V1      O2      C12     C13         11.7(5)     .       .       .       .   no 
 V1      O2      C12     C17       -168.0(2)     .       .       .       .   no 
 V1      N1      C7      C2          68.6(3)     .       .       .       .   no 
 C8      N1      C7      C2         -55.5(4)     .       .       .       .   no 
 C9      N1      C7      C2        -173.6(3)     .       .       .       .   no 
 V1      N2      C18     C13         68.9(3)     .       .       .       .   no 
 C19     N2      C18     C13        -55.1(4)     .       .       .       .   no 
 C20     N2      C18     C13       -173.0(3)     .       .       .       .   no 
 O1      C1      C2      C3        -177.5(3)     .       .       .       .   no 
 O1      C1      C2      C7           3.8(5)     .       .       .       .   no 
 C6      C1      C2      C7        -178.7(3)     .       .       .       .   no 
 O1      C1      C6      C5         178.5(3)     .       .       .       .   no 
 C6      C1      C2      C3           0.0(5)     .       .       .       .   no 
 C2      C1      C6      C5           0.9(5)     .       .       .       .   no 
 C2      C1      C6      C10       -179.9(3)     .       .       .       .   no 
 O1      C1      C6      C10         -2.3(4)     .       .       .       .   no 
 C1      C2      C3      C4          -0.9(5)     .       .       .       .   no 
 C1      C2      C7      N1         -46.8(5)     .       .       .       .   no 
 C3      C2      C7      N1         134.5(3)     .       .       .       .   no 
 C7      C2      C3      C4         177.8(3)     .       .       .       .   no 
 C2      C3      C4      C5           0.9(6)     .       .       .       .   no 
 C2      C3      C4      C11        179.9(5)     .       .       .       .   no 
 C3      C4      C5      C6           0.0(6)     .       .       .       .   no 
 C11     C4      C5      C6        -178.9(4)     .       .       .       .   no 
 C4      C5      C6      C1          -0.9(6)     .       .       .       .   no 
 C4      C5      C6      C10        179.9(4)     .       .       .       .   no 
 O2      C12     C13     C14       -178.7(3)     .       .       .       .   no 
 O2      C12     C13     C18          2.0(5)     .       .       .       .   no 
 C17     C12     C13     C14          1.0(5)     .       .       .       .   no 
 C17     C12     C13     C18       -178.3(3)     .       .       .       .   no 
 O2      C12     C17     C16        178.7(3)     .       .       .       .   no 
 O2      C12     C17     C21         -2.9(4)     .       .       .       .   no 
 C13     C12     C17     C16         -1.0(4)     .       .       .       .   no 
 C13     C12     C17     C21        177.4(3)     .       .       .       .   no 
 C12     C13     C14     C15         -0.1(5)     .       .       .       .   no 
 C14     C13     C18     N2         132.6(3)     .       .       .       .   no 
 C12     C13     C18     N2         -48.1(4)     .       .       .       .   no 
 C18     C13     C14     C15        179.2(3)     .       .       .       .   no 
 C13     C14     C15     C16         -0.8(5)     .       .       .       .   no 
 C13     C14     C15     C22        179.3(3)     .       .       .       .   no 
 C22     C15     C16     C17       -179.3(3)     .       .       .       .   no 
 C14     C15     C16     C17          0.8(5)     .       .       .       .   no 
 C15     C16     C17     C12          0.1(5)     .       .       .       .   no 
 C15     C16     C17     C21       -178.3(3)     .       .       .       .   no 
 N3      C23     C24     C25        179.6(4)     .       .       .       .   no 
 C24     C23     C28     C27          0.0(6)     .       .       .       .   no 
 C28     C23     C24     C25         -0.3(6)     .       .       .       .   no 
 N3      C23     C28     C27       -179.8(4)     .       .       .       .   no 
 C23     C24     C25     C26          0.8(7)     .       .       .       .   no 
 C24     C25     C26     C27         -1.0(7)     .       .       .       .   no 
 C25     C26     C27     C28          0.7(7)     .       .       .       .   no 
 C26     C27     C28     C23         -0.2(7)     .       .       .       .   no 
 C34     C29     C30     C31         -0.1(8)     .       .       .       .   no 
 C30     C29     C34     C33         -0.7(9)     .       .       .       .   no 
 C29     C30     C31     C32         0.8(10)     .       .       .       .   no 
 C30     C31     C32     C33        -0.8(12)     .       .       .       .   no 
 C31     C32     C33     C34         0.0(12)     .       .       .       .   no 
 C32     C33     C34     C29         0.8(11)     .       .       .       .   no 

loop_
_geom_contact_atom_site_label_1     
_geom_contact_atom_site_label_2     
_geom_contact_distance              
_geom_contact_site_symmetry_1       
_geom_contact_site_symmetry_2       
_geom_contact_publ_flag             
 O1      H10A         2.3243                     .       .                   no 
 O1      H19C         2.5836                     .       .                   no 
 O1      H20A         2.8030                     .       .                   no 
 O1      H30          2.8732                     .     2_666                 no 
 O2      H8A          2.5208                     .       .                   no 
 O2      H9B          2.6907                     .       .                   no 
 O2      H21A         2.3353                     .       .                   no 
 O2      H29          2.6954                     .     2_666                 no 
 N3      H7A          2.7641                     .       .                   no 
 N3      H9A          2.6088                     .       .                   no 
 N3      H18A         2.8801                     .       .                   no 
 N3      H20C         2.6026                     .       .                   no 
 C1      C8         3.340(5)                     .       .                   no 
 C8      C1         3.340(5)                     .       .                   no 
 C9      C15        3.531(6)                     .     1_455                 no 
 C12     C19        3.364(5)                     .       .                   no 
 C15     C9         3.531(6)                     .     1_655                 no 
 C19     C12        3.364(5)                     .       .                   no 
 C1      H8B          2.7427                     .       .                   no 
 C1      H30          2.9937                     .     2_666                 no 
 C2      H8B          2.5286                     .       .                   no 
 C3      H11B         3.0591                     .     2_566                 no 
 C4      H26          2.8309                     .     2_465                 no 
 C4      H11B         2.8272                     .     2_566                 no 
 C5      H11B         3.0836                     .     2_566                 no 
 C6      H30          3.0465                     .     2_666                 no 
 C8      H21C         3.0517                     .     2_676                 no 
 C8      H21A         3.0892                     .       .                   no 
 C10     H30          3.0709                     .     2_666                 no 
 C12     H27          2.9281                     .     2_575                 no 
 C12     H19A         2.7763                     .       .                   no 
 C12     H29          2.8265                     .     2_666                 no 
 C13     H19A         2.5685                     .       .                   no 
 C14     H9A          2.9869                     .     1_655                 no 
 C16     H11C         3.0980                     .     1_665                 no 
 C17     H29          2.9657                     .     2_666                 no 
 C17     H27          2.9248                     .     2_575                 no 
 C18     H22B         2.8621                     .     2_675                 no 
 C19     H7A          3.0587                     .     1_655                 no 
 C21     H8A          3.0633                     .       .                   no 
 C21     H11C         3.0438                     .     1_665                 no 
 C21     H29          3.0788                     .     2_666                 no 
 C22     H18A         2.9909                     .     2_675                 no 
 C23     H9A          3.0022                     .       .                   no 
 C23     H20C         2.9786                     .       .                   no 
 C24     H19B         3.0460                     .     1_455                 no 
 C25     H20B         2.9783                     .     1_455                 no 
 C27     H18B         3.0696                     .     1_455                 no 
 C28     H14          2.9992                     .     1_455                 no 
 C29     H19A         3.0291                     .     2_666                 no 
 C31     H3           3.0134                     .     2_566                 no 
 C31     H11A         3.0678                     .     1_655                 no 
 C33     H8C          3.0364                     .     2_566                 no 
 C34     H9C          3.0575                     .     2_566                 no 
 H3      C31          3.0134                     .     2_566                 no 
 H3      H11A         2.3408                     .       .                   no 
 H3      H7B          2.2917                     .       .                   no 
 H5      H22A         2.5091                     .     1_445                 no 
 H5      H32          2.2529                     .       .                   no 
 H7A     N3           2.7641                     .       .                   no 
 H7A     C19          3.0587                     .     1_455                 no 
 H7A     H19B         2.5538                     .     1_455                 no 
 H7A     H9A          2.4582                     .       .                   no 
 H7B     H8C          2.4735                     .       .                   no 
 H7B     H3           2.2917                     .       .                   no 
 H7B     H9C          2.3356                     .       .                   no 
 H8A     O2           2.5208                     .       .                   no 
 H8A     C21          3.0633                     .       .                   no 
 H8A     H21A         2.1196                     .       .                   no 
 H8A     H9B          2.4060                     .       .                   no 
 H8B     C2           2.5286                     .       .                   no 
 H8B     C1           2.7427                     .       .                   no 
 H8C     H7B          2.4735                     .       .                   no 
 H8C     C33          3.0364                     .     2_566                 no 
 H8C     H9C          2.3821                     .       .                   no 
 H9A     N3           2.6088                     .       .                   no 
 H9A     H7A          2.4582                     .       .                   no 
 H9A     C14          2.9869                     .     1_455                 no 
 H9A     C23          3.0022                     .       .                   no 
 H9B     O2           2.6907                     .       .                   no 
 H9B     H8A          2.4060                     .       .                   no 
 H9C     C34          3.0575                     .     2_566                 no 
 H9C     H8C          2.3821                     .       .                   no 
 H9C     H7B          2.3356                     .       .                   no 
 H10A    O1           2.3243                     .       .                   no 
 H10A    H19C         2.2058                     .       .                   no 
 H10B    H22A         2.5522                     .     1_445                 no 
 H11A    H3           2.3408                     .       .                   no 
 H11A    H31          2.4982                     .     1_455                 no 
 H11A    C31          3.0678                     .     1_455                 no 
 H11B    C4           2.8272                     .     2_566                 no 
 H11B    C5           3.0836                     .     2_566                 no 
 H11B    C3           3.0591                     .     2_566                 no 
 H11C    H16          2.4719                     .     1_445                 no 
 H11C    H21B         2.3031                     .     1_445                 no 
 H11C    C16          3.0980                     .     1_445                 no 
 H11C    C21          3.0438                     .     1_445                 no 
 H14     C28          2.9992                     .     1_655                 no 
 H14     H18B         2.3118                     .       .                   no 
 H16     H11C         2.4719                     .     1_665                 no 
 H16     H22A         2.3613                     .       .                   no 
 H18A    C22          2.9909                     .     2_675                 no 
 H18A    H22B         2.0963                     .     2_675                 no 
 H18A    H20C         2.4295                     .       .                   no 
 H18A    N3           2.8801                     .       .                   no 
 H18B    H14          2.3118                     .       .                   no 
 H18B    H19B         2.4654                     .       .                   no 
 H18B    C27          3.0696                     .     1_655                 no 
 H18B    H20B         2.3147                     .       .                   no 
 H19A    C13          2.5685                     .       .                   no 
 H19A    C29          3.0291                     .     2_666                 no 
 H19A    C12          2.7763                     .       .                   no 
 H19A    H29          2.5305                     .     2_666                 no 
 H19B    H20B         2.3811                     .       .                   no 
 H19B    C24          3.0460                     .     1_655                 no 
 H19B    H7A          2.5538                     .     1_655                 no 
 H19B    H18B         2.4654                     .       .                   no 
 H19C    H20A         2.3846                     .       .                   no 
 H19C    H10A         2.2058                     .       .                   no 
 H19C    O1           2.5836                     .       .                   no 
 H20A    O1           2.8030                     .       .                   no 
 H20A    H20A         2.4128                     .     2_565                 no 
 H20A    H19C         2.3846                     .       .                   no 
 H20B    C25          2.9783                     .     1_655                 no 
 H20B    H19B         2.3811                     .       .                   no 
 H20B    H18B         2.3147                     .       .                   no 
 H20C    C23          2.9786                     .       .                   no 
 H20C    N3           2.6026                     .       .                   no 
 H20C    H18A         2.4295                     .       .                   no 
 H21A    O2           2.3353                     .       .                   no 
 H21A    C8           3.0892                     .       .                   no 
 H21A    H8A          2.1196                     .       .                   no 
 H21B    H11C         2.3031                     .     1_665                 no 
 H21C    C8           3.0517                     .     2_676                 no 
 H22A    H10B         2.5522                     .     1_665                 no 
 H22A    H5           2.5091                     .     1_665                 no 
 H22A    H32          2.5244                     .     1_665                 no 
 H22A    H16          2.3613                     .       .                   no 
 H22B    C18          2.8621                     .     2_675                 no 
 H22B    H18A         2.0963                     .     2_675                 no 
 H26     C4           2.8309                     .     2_465                 no 
 H27     C17          2.9248                     .     2_575                 no 
 H27     C12          2.9281                     .     2_575                 no 
 H29     O2           2.6954                     .     2_666                 no 
 H29     C12          2.8265                     .     2_666                 no 
 H29     C17          2.9657                     .     2_666                 no 
 H29     C21          3.0788                     .     2_666                 no 
 H29     H19A         2.5305                     .     2_666                 no 
 H30     O1           2.8732                     .     2_666                 no 
 H30     C1           2.9937                     .     2_666                 no 
 H30     C6           3.0465                     .     2_666                 no 
 H30     C10          3.0709                     .     2_666                 no 
 H31     H11A         2.4982                     .     1_655                 no 
 H32     H5           2.2529                     .       .                   no 
 H32     H22A         2.5244                     .     1_445                 no 

loop_
_geom_hbond_atom_site_label_D
_geom_hbond_atom_site_label_H
_geom_hbond_atom_site_label_A
_geom_hbond_distance_DH
_geom_hbond_distance_HA
_geom_hbond_distance_DA
_geom_hbond_angle_DHA
_geom_hbond_site_symmetry_A
_geom_hbond_publ_flag
#
#D   H   A   D - H  H...A   D...A    D - H...A  symm(A)
#
C8      H8A     O2          0.9806     2.5208   3.030(4)     112.15     .   yes 
C9      H9A     N3          0.9795     2.6088   3.107(5)     111.66     .   yes 
C10     H10A    O1          0.9805     2.3243   2.801(5)     109.00     .   yes 
C19     H19C    O1          0.9808     2.5836   3.063(5)     110.14     .   yes 
C20     H20C    N3          0.9802     2.6026   3.088(5)     110.64     .   yes 
C21     H21A    O2          0.9795     2.3353   2.809(5)     108.88     .   yes 

#===END

# CIF-file generated for  s2046c  - complex 12                               

#===============================================================================

data_s2046c  

#===============================================================================

# 5. CHEMICAL DATA

_chemical_name_systematic           
;
 ?
;
_chemical_name_common                ?
_chemical_melting_point              ?
_chemical_formula_moiety            'C8 H10 Cl2 N O2 V'
_chemical_formula_sum               'C8 H10 Cl2 N O2 V'
_chemical_formula_weight                274.01
_chemical_compound_source           'see text'

loop_
_atom_type_symbol                   
_atom_type_description              
_atom_type_scat_dispersion_real     
_atom_type_scat_dispersion_imag     
_atom_type_scat_source              
 V   V    0.3005    0.5294
 'International Tables Vol C Tables 4.2.6.8 and 6.1.1.4'
 O   O    0.0106    0.0060
 'International Tables Vol C Tables 4.2.6.8 and 6.1.1.4'
 N   N    0.0061    0.0033
 'International Tables Vol C Tables 4.2.6.8 and 6.1.1.4'
Cl  Cl    0.1484    0.1585
 'International Tables Vol C Tables 4.2.6.8 and 6.1.1.4'
 H   H    0.0000    0.0000
 'International Tables Vol C Tables 4.2.6.8 and 6.1.1.4'
 C   C    0.0033    0.0016
 'International Tables Vol C Tables 4.2.6.8 and 6.1.1.4'

#===============================================================================

# 6. CRYSTAL DATA

_symmetry_cell_setting               Orthorhombic
_symmetry_space_group_name_Hall      '-P 2ac 2ab'
_symmetry_space_group_name_H-M       'P b c a'

loop_
_symmetry_equiv_pos_as_xyz          
 x,y,z                         
 1/2-x,-y,1/2+z                
 1/2+x,1/2-y,-z                
 -x,1/2+y,1/2-z                
 -x,-y,-z                      
 1/2+x,y,1/2-z                 
 1/2-x,1/2+y,z                 
 x,1/2-y,1/2+z                 

_cell_length_a                         11.8576(12)
_cell_length_b                         12.6710(13)
_cell_length_c                           14.722(2)
_cell_angle_alpha                               90
_cell_angle_beta                                90
_cell_angle_gamma                               90
_cell_volume                             2211.9(4)
_cell_formula_units_Z                    8
_cell_measurement_temperature          225
_cell_measurement_reflns_used       25 
_cell_measurement_theta_min         10 
_cell_measurement_theta_max         14 
_cell_special_details               
; SET4 
;

_exptl_crystal_description          plate 
_exptl_crystal_colour               orange 
_exptl_crystal_size_max            0.63 
_exptl_crystal_size_mid            0.50 
_exptl_crystal_size_min            0.10 
_exptl_crystal_density_diffrn            1.646
_exptl_crystal_density_method       'Not Measured'
_exptl_crystal_F_000                      1104
_exptl_absorpt_coefficient_mu            1.352
_exptl_absorpt_correction_type      none 

#===============================================================================

# 7. EXPERIMENTAL DATA

_exptl_special_details              
; ?
;
_diffrn_ambient_temperature         225 
_diffrn_radiation_wavelength           0.71073
_diffrn_radiation_type               'Mo K\a'
_diffrn_radiation_source            'Rotating Anode' 
_diffrn_radiation_monochromator     'graphite' 

_diffrn_measurement_device_type      'CAD4T' 
_diffrn_measurement_method          'omega-scan' 

_diffrn_standards_number             3


# number of measured reflections (redundant set)
_diffrn_reflns_number                 2992
_diffrn_reflns_av_R_equivalents       0.0707
_diffrn_reflns_av_sigmaI/netI         0.0790
_diffrn_reflns_limit_h_min             -15
_diffrn_reflns_limit_h_max               0
_diffrn_reflns_limit_k_min             -16
_diffrn_reflns_limit_k_max               0
_diffrn_reflns_limit_l_min             -19
_diffrn_reflns_limit_l_max              12
_diffrn_reflns_theta_min              2.73
_diffrn_reflns_theta_max             27.46

# number of unique reflections
_reflns_number_total                    2533
# number of observed reflections (> n sig(I))
_reflns_number_gt                       1653
_reflns_threshold_expression         'I>2\s(I)' 

_computing_structure_refinement      'SHELXL-97 (Sheldrick, 1997)'
_computing_publication_material      'PLATON (Spek, 1990)' 

#===============================================================================

# 8. REFINEMENT DATA

_refine_special_details             
;
 Refinement on F^2 for ALL reflections except those
 flagged by the user for potential systematic errors.
 Weighted R-factors wR and all goodnesses of fit S
 are based on F^2, conventional R-factors R are based
 on F, with F set to zero for negative F^2. The
 observed criterion of F^2 > 2sigma(F^2) is used only
 for calculating -R-factor-obs etc. and is not
 relevant to the choice of reflections for refinement.
 R-factors based on F^2 are statistically about twice
 as large as those based on F, and R-factors based on
 ALL data will be even larger.
;
_refine_ls_structure_factor_coef     Fsqd       
_refine_ls_matrix_type               full       
_refine_ls_weighting_scheme          'calc       '
_refine_ls_weighting_details        
'calc w=1/[\s^2^(Fo^2^)+(0.0610P)^2^+0.4970P] where P=(Fo^2^+2Fc^2^)/3'         
_refine_ls_hydrogen_treatment        'H-atom refinement: see text ' 
_refine_ls_extinction_method         none       
_refine_ls_abs_structure_details     none
_refine_ls_abs_structure_Flack       none
_refine_ls_number_reflns                  2533
_refine_ls_number_parameters               129
_refine_ls_number_restraints                 0
_refine_ls_R_factor_all                 0.0944
_refine_ls_R_factor_gt                  0.0520
_refine_ls_wR_factor_ref                0.1378
_refine_ls_wR_factor_gt                 0.1173
_refine_ls_goodness_of_fit_ref           1.045
_refine_ls_restrained_S_all              1.045
_refine_ls_shift/su_max                  0.000
_refine_ls_shift/su_mean                 0.000
_refine_diff_density_max                 0.390
_refine_diff_density_min                -0.536
_refine_diff_density_rms                 0.102

#===============================================================================

# 9. ATOMIC COORDINATES AND THERMAL PARAMETERS

loop_
_atom_site_label                    
_atom_site_type_symbol              
_atom_site_thermal_displace_type    
_atom_site_fract_x                  
_atom_site_fract_y                  
_atom_site_fract_z                  
_atom_site_occupancy                
_atom_site_U_iso_or_equiv           
 V      V  Uani    0.21153(6)   0.11896(5)   0.13657(4)     1.000    0.0263(2)  
 Cl1    Cl Uani   0.05951(10)  0.13865(10)   0.22391(7)     1.000    0.0436(4)  
 Cl2    Cl Uani   0.28937(11)   0.26995(9)   0.18027(8)     1.000    0.0472(4)  
 O1     O  Uani     0.2749(2)    0.0222(2)  0.18069(19)     1.000    0.0379(9)  
 O2     O  Uani     0.1361(2)    0.0852(2)  0.03757(17)     1.000    0.0361(9)  
 N1     N  Uani     0.3361(3)    0.1224(3)    0.0293(2)     1.000    0.0262(9)  
 C1     C  Uani     0.1766(3)    0.0483(3)   -0.0486(2)     1.000   0.0285(11)  
 C2     C  Uani     0.2991(3)    0.0834(3)   -0.0499(2)     1.000   0.0244(11)  
 C3     C  Uani     0.3690(4)    0.0759(3)   -0.1248(3)     1.000   0.0347(12)  
 C4     C  Uani     0.4793(4)    0.1078(4)   -0.1173(3)     1.000   0.0380(14)  
 C5     C  Uani     0.5175(4)    0.1458(3)   -0.0351(3)     1.000   0.0387(16)  
 C6     C  Uani     0.4452(3)    0.1520(3)    0.0362(3)     1.000   0.0327(12)  
 C7     C  Uani     0.1679(4)   -0.0716(3)   -0.0519(3)     1.000   0.0403(16)  
 C8     C  Uani     0.1088(4)    0.1018(4)   -0.1225(3)     1.000   0.0410(14)  
 H3     H  Uiso       0.34180      0.04950     -0.17950     1.000       0.0420  
 H4     H  Uiso       0.52750      0.10400     -0.16700     1.000       0.0460  
 H5     H  Uiso       0.59220      0.16690     -0.02860     1.000       0.0470  
 H6     H  Uiso       0.47160      0.17740      0.09150     1.000       0.0390  
 H7A    H  Uiso       0.20160     -0.10100      0.00170     1.000       0.0610  
 H7B    H  Uiso       0.20660     -0.09740     -0.10470     1.000       0.0610  
 H7C    H  Uiso       0.09000     -0.09180     -0.05480     1.000       0.0610  
 H8A    H  Uiso       0.03080      0.08270     -0.11650     1.000       0.0610  
 H8B    H  Uiso       0.13610      0.07970     -0.18080     1.000       0.0610  
 H8C    H  Uiso       0.11650      0.17690     -0.11690     1.000       0.0610  

loop_
_atom_site_aniso_label              
_atom_site_aniso_U_11               
_atom_site_aniso_U_22               
_atom_site_aniso_U_33               
_atom_site_aniso_U_23               
_atom_site_aniso_U_13               
_atom_site_aniso_U_12               
  V        0.0319(4)  0.0292(3)  0.0178(3)   0.0000(3)   0.0006(3)   0.0009(3)  
  Cl1      0.0426(6)  0.0588(8)  0.0295(5)  -0.0018(5)   0.0120(5)   0.0070(5)  
  Cl2      0.0608(7)  0.0343(6)  0.0465(6)  -0.0135(5)   0.0033(6)  -0.0059(6)  
  O1      0.0453(18) 0.0344(16) 0.0339(15)  0.0110(13)  0.0031(14)  0.0061(14)  
  O2      0.0271(15) 0.0608(19) 0.0203(13) -0.0085(13)  0.0032(12) -0.0040(14)  
  N1      0.0273(16) 0.0283(17) 0.0230(15)  0.0023(13)  0.0000(13) -0.0004(14)  
  C1      0.0222(19)   0.044(2) 0.0194(17) -0.0055(17)  0.0006(15)  0.0023(17)  
  C2        0.028(2) 0.0261(18) 0.0192(17)  0.0006(15) -0.0011(16)  0.0015(16)  
  C3        0.039(2)   0.039(2)   0.026(2) -0.0021(18)  0.0015(18)  0.0018(19)  
  C4        0.037(2)   0.040(3)   0.037(2)  0.0043(19)  0.0144(19)   -0.002(2)  
  C5        0.030(2)   0.038(3)   0.048(3)    0.004(2)    0.006(2) -0.0060(19)  
  C6        0.033(2)   0.034(2)   0.031(2)  0.0001(17) -0.0049(19) -0.0063(18)  
  C7        0.031(2)   0.045(3)   0.045(3)   -0.003(2)   -0.003(2)   -0.007(2)  
  C8        0.034(2)   0.061(3)   0.028(2)   -0.003(2) -0.0024(18)    0.010(2)  

#===============================================================================

# 10. MOLECULAR GEOMETRY

_geom_special_details               
;
 Bond distances, angles etc. have been calculated using the
 rounded fractional coordinates. All esds are estimated
 from the variances of the (full) variance-covariance matrix.
 The cell esds are taken into account in the estimation of
 distances, angles and torsion angles
;

loop_
_geom_bond_atom_site_label_1        
_geom_bond_atom_site_label_2        
_geom_bond_distance                 
_geom_bond_site_symmetry_1          
_geom_bond_site_symmetry_2          
_geom_bond_publ_flag                
 V       Cl1      2.2282(14)                     .       .                   yes
 V       Cl2      2.2195(14)                     .       .                   yes
 V       O1         1.578(3)                     .       .                   yes
 V       O2         1.763(3)                     .       .                   yes
 V       N1         2.163(3)                     .       .                   yes
 O2      C1         1.435(4)                     .       .                   yes
 N1      C2         1.340(4)                     .       .                   yes
 N1      C6         1.351(5)                     .       .                   yes
 C1      C2         1.519(5)                     .       .                   no 
 C1      C7         1.524(5)                     .       .                   no 
 C1      C8         1.513(6)                     .       .                   no 
 C2      C3         1.383(6)                     .       .                   no 
 C3      C4         1.373(7)                     .       .                   no 
 C4      C5         1.379(6)                     .       .                   no 
 C5      C6         1.358(6)                     .       .                   no 
 C3      H3           0.9297                     .       .                   no 
 C4      H4           0.9297                     .       .                   no 
 C5      H5           0.9302                     .       .                   no 
 C6      H6           0.9297                     .       .                   no 
 C7      H7A          0.9598                     .       .                   no 
 C7      H7B          0.9600                     .       .                   no 
 C7      H7C          0.9595                     .       .                   no 
 C8      H8A          0.9601                     .       .                   no 
 C8      H8B          0.9591                     .       .                   no 
 C8      H8C          0.9595                     .       .                   no 

loop_
_geom_angle_atom_site_label_1       
_geom_angle_atom_site_label_2       
_geom_angle_atom_site_label_3       
_geom_angle                         
_geom_angle_site_symmetry_1         
_geom_angle_site_symmetry_2         
_geom_angle_site_symmetry_3         
_geom_angle_publ_flag               
 Cl1     V       Cl2        94.17(5)             .       .       .           yes
 Cl1     V       O1       103.57(10)             .       .       .           yes
 Cl1     V       O2         95.38(9)             .       .       .           yes
 Cl1     V       N1       166.31(10)             .       .       .           yes
 Cl2     V       O1       110.64(10)             .       .       .           yes
 Cl2     V       O2        131.29(9)             .       .       .           yes
 Cl2     V       N1        84.85(11)             .       .       .           yes
 O1      V       O2       113.17(13)             .       .       .           yes
 O1      V       N1        89.48(14)             .       .       .           yes
 O2      V       N1        75.39(12)             .       .       .           yes
 V       O2      C1         129.8(2)             .       .       .           yes
 V       N1      C2         113.8(3)             .       .       .           yes
 V       N1      C6         127.2(3)             .       .       .           yes
 C2      N1      C6         118.8(3)             .       .       .           yes
 O2      C1      C2         103.6(3)             .       .       .           yes
 O2      C1      C7         109.3(3)             .       .       .           yes
 O2      C1      C8         108.2(3)             .       .       .           yes
 C2      C1      C7         110.9(3)             .       .       .           no 
 C2      C1      C8         111.6(3)             .       .       .           no 
 C7      C1      C8         112.8(3)             .       .       .           no 
 N1      C2      C1         114.2(3)             .       .       .           yes
 N1      C2      C3         121.5(4)             .       .       .           yes
 C1      C2      C3         124.3(3)             .       .       .           no 
 C2      C3      C4         119.1(4)             .       .       .           no 
 C3      C4      C5         119.1(4)             .       .       .           no 
 C4      C5      C6         119.4(4)             .       .       .           no 
 N1      C6      C5         122.0(4)             .       .       .           yes
 C2      C3      H3           120.50             .       .       .           no 
 C4      C3      H3           120.39             .       .       .           no 
 C3      C4      H4           120.46             .       .       .           no 
 C5      C4      H4           120.45             .       .       .           no 
 C4      C5      H5           120.23             .       .       .           no 
 C6      C5      H5           120.34             .       .       .           no 
 N1      C6      H6           118.98             .       .       .           no 
 C5      C6      H6           118.98             .       .       .           no 
 C1      C7      H7A          109.43             .       .       .           no 
 C1      C7      H7B          109.45             .       .       .           no 
 C1      C7      H7C          109.43             .       .       .           no 
 H7A     C7      H7B          109.54             .       .       .           no 
 H7A     C7      H7C          109.50             .       .       .           no 
 H7B     C7      H7C          109.47             .       .       .           no 
 C1      C8      H8A          109.44             .       .       .           no 
 C1      C8      H8B          109.47             .       .       .           no 
 C1      C8      H8C          109.39             .       .       .           no 
 H8A     C8      H8B          109.50             .       .       .           no 
 H8A     C8      H8C          109.50             .       .       .           no 
 H8B     C8      H8C          109.53             .       .       .           no 

loop_
_geom_torsion_atom_site_label_1     
_geom_torsion_atom_site_label_2     
_geom_torsion_atom_site_label_3     
_geom_torsion_atom_site_label_4     
_geom_torsion                       
_geom_torsion_site_symmetry_1       
_geom_torsion_site_symmetry_2       
_geom_torsion_site_symmetry_3       
_geom_torsion_site_symmetry_4       
_geom_torsion_publ_flag             
 Cl1     V       O2      C1        -172.1(3)     .       .       .       .   no 
 Cl2     V       O2      C1          87.6(3)     .       .       .       .   no 
 O1      V       O2      C1         -64.8(3)     .       .       .       .   no 
 N1      V       O2      C1          18.2(3)     .       .       .       .   no 
 Cl2     V       N1      C2        -144.6(3)     .       .       .       .   no 
 Cl2     V       N1      C6          40.3(3)     .       .       .       .   no 
 O1      V       N1      C2         104.6(3)     .       .       .       .   no 
 O1      V       N1      C6         -70.5(4)     .       .       .       .   no 
 O2      V       N1      C2          -9.5(3)     .       .       .       .   no 
 O2      V       N1      C6         175.4(4)     .       .       .       .   no 
 V       O2      C1      C2         -21.0(4)     .       .       .       .   no 
 V       O2      C1      C7          97.2(3)     .       .       .       .   no 
 V       O2      C1      C8        -139.6(3)     .       .       .       .   no 
 V       N1      C2      C1           1.9(4)     .       .       .       .   no 
 V       N1      C2      C3        -177.5(3)     .       .       .       .   no 
 C6      N1      C2      C1         177.5(3)     .       .       .       .   no 
 C6      N1      C2      C3          -1.9(6)     .       .       .       .   no 
 V       N1      C6      C5         176.5(3)     .       .       .       .   no 
 C2      N1      C6      C5           1.6(6)     .       .       .       .   no 
 O2      C1      C2      N1           8.6(4)     .       .       .       .   no 
 C7      C1      C2      C3          70.8(4)     .       .       .       .   no 
 O2      C1      C2      C3        -172.0(3)     .       .       .       .   no 
 C7      C1      C2      N1        -108.6(4)     .       .       .       .   no 
 C8      C1      C2      C3         -55.9(5)     .       .       .       .   no 
 C8      C1      C2      N1         124.8(4)     .       .       .       .   no 
 C1      C2      C3      C4        -178.4(4)     .       .       .       .   no 
 N1      C2      C3      C4           0.9(6)     .       .       .       .   no 
 C2      C3      C4      C5           0.4(7)     .       .       .       .   no 
 C3      C4      C5      C6          -0.7(7)     .       .       .       .   no 
 C4      C5      C6      N1          -0.3(6)     .       .       .       .   no 

loop_
_geom_contact_atom_site_label_1     
_geom_contact_atom_site_label_2     
_geom_contact_distance              
_geom_contact_site_symmetry_1       
_geom_contact_site_symmetry_2       
_geom_contact_publ_flag             
 V       H7A          3.4241                     .       .                   no 
 V       H3           3.5055                     .     2_555                 no 
 V       H5           3.4484                     .     3_455                 no 
 Cl1     C3         3.615(4)                     .     2_555                 no 
 Cl2     C3         3.598(4)                     .     8_555                 no 
 Cl2     O1         3.286(3)                     .     7_555                 no 
 Cl1     H6           2.9517                     .     6_455                 no 
 Cl1     H3           3.0125                     .     2_555                 no 
 Cl1     H7C          3.1135                     .     5_555                 no 
 Cl2     H7A          3.0978                     .     7_555                 no 
 Cl2     H6           2.7843                     .       .                   no 
 Cl2     H3           3.1436                     .     8_555                 no 
 O1      Cl2        3.286(3)                     .     7_545                 no 
 O1      H8B          2.6342                     .     2_555                 no 
 O1      H4           2.8439                     .     5_655                 no 
 O1      H3           2.6414                     .     2_555                 no 
 O2      H7C          2.6943                     .     5_555                 no 
 C3      Cl2        3.598(4)                     .     8_554                 no 
 C3      Cl1        3.615(4)                     .     2_554                 no 
 C3      H8B          2.8825                     .       .                   no 
 C3      H7B          2.9356                     .       .                   no 
 C8      H3           2.9625                     .       .                   no 
 H3      C8           2.9625                     .       .                   no 
 H3      H8B          2.4690                     .       .                   no 
 H3      V            3.5055                     .     2_554                 no 
 H3      Cl1          3.0125                     .     2_554                 no 
 H3      O1           2.6414                     .     2_554                 no 
 H3      Cl2          3.1436                     .     8_554                 no 
 H4      O1           2.8439                     .     5_655                 no 
 H5      V            3.4483                     .     3_555                 no 
 H6      Cl2          2.7843                     .       .                   no 
 H6      H8C          2.5496                     .     3_555                 no 
 H6      Cl1          2.9517                     .     6_555                 no 
 H7A     V            3.4241                     .       .                   no 
 H7A     Cl2          3.0978                     .     7_545                 no 
 H7B     C3           2.9356                     .       .                   no 
 H7C     H8A          2.4913                     .       .                   no 
 H7C     Cl1          3.1135                     .     5_555                 no 
 H7C     O2           2.6943                     .     5_555                 no 
 H8A     H7C          2.4913                     .       .                   no 
 H8B     C3           2.8825                     .       .                   no 
 H8B     H3           2.4690                     .       .                   no 
 H8B     O1           2.6342                     .     2_554                 no 
 H8C     H6           2.5496                     .     3_455                 no 

loop_
_geom_hbond_atom_site_label_D
_geom_hbond_atom_site_label_H
_geom_hbond_atom_site_label_A
_geom_hbond_distance_DH
_geom_hbond_distance_HA
_geom_hbond_distance_DA
_geom_hbond_angle_DHA
_geom_hbond_site_symmetry_A
_geom_hbond_publ_flag
#
#D   H   A   D - H  H...A   D...A    D - H...A  symm(A)
#
C6      H6      Cl2         0.9297     2.7843   3.185(4)     107.19     .   yes 

#===END
